# Supplementary material for: Mid/Late Devonian-Carboniferous collapse basins on the Finnmark Platform and in the southwesternmost Nordkapp basin, SW Barents Sea
Source: Copernicus journal article supplement (doi:10.5194/se-2017-124), 2017-11-07
Supplement: Supplementary file [file se-2017-124-AC2-supplement.pdf]

# Mid/Late Devonian-Carboniferous collapse basins on the Finnmark Platform and in the southwesternmost Nordkapp basin, SW Barents Sea

5 Jean-Baptiste Koehl<sup>1,2</sup>, Steffen G. Bergh<sup>1,2</sup>, Tormod Henningsen<sup>1</sup>, Jan-Inge Faleide<sup>2,3</sup>

<sup>1</sup>Department of Geosciences, University of Tromsø, N-9037 Tromsø, Norway.

<sup>2</sup>Research Centre for Arctic Petroleum Exploration (ARCEX), University of Tromsø, N-9037 Tromsø, Norway.

<sup>3</sup>Department of Geosciences, University of Oslo, P.O. Box 1047 Blindern, NO-0316 Oslo, Norway.

Correspondence to: Jean-Baptiste Koehl ([jean-baptiste.koehl@uit.no](mailto:jean-baptiste.koehl@uit.no))

10  
15  
20  
25  
30

**Abstract.** The SW Barents Sea margin experienced a pulse of extensional deformation in the Middle-Late Devonian through the Carboniferous, after the Caledonian Orogeny terminated. These events marked the initial stages of formation of major offshore basins such as the Hammerfest and Nordkapp basins. We mapped and analyzed three major fault complexes, i) the Måsøy Fault Complex, ii) the Rolvsøya fault, iii) the Troms-Finnmark Fault Complex. We discuss the formation of the Måsøy Fault Complex as a possible extensional splay of an overall NE-SW trending, NW-dipping, basement-seated Caledonian shear zone, the Sørøya-Ingøya shear zone, which was partly inverted during the collapse of the Caledonides and accommodated top-to-the-NW normal displacement in Mid/Late Devonian-Carboniferous times. The Troms-Finnmark Fault Complex displays a zigzag-shaped pattern of NNE-SSW and ENE-WSW trending extensional faults before it terminates to the north as a WNW-ESE trending, NE-dipping normal fault that separates the southwesternmost Nordkapp basin in the northeast from the Finnmark Platform west and the Gjesvær Low in the southwest. The WNW-ESE trending, margin-oblique segment of the Troms-Finnmark Fault Complex is considered to represent the offshore prolongation of a major Neoproterozoic fault complex, the Trollfjorden-Komagelva Fault Zone, which is made of WNW-ESE trending, subvertical faults that crop out on the island of Magerøya in NW Finnmark. Our results suggest that the Trollfjorden-Komagelva Fault Zone dies out to the northwest before reaching the Finnmark Platform west. We propose an alternative model for the origin of the WNW-ESE trending fault segment of the Troms-Finnmark Fault Complex as a possible hard-linked, accommodation cross-fault that developed along the Sørøya-Ingøya shear zone. This brittle fault

decoupled the Finnmark Platform west from the southwesternmost Nordkapp basin and merged with the Måsøy Fault Complex in Carboniferous times. Seismic data over the Gjesvær Low and southwesternmost Nordkapp basin show that the low-gravity anomaly observed in these areas may result from the presence of Mid/Late Devonian sedimentary units resembling Middle Devonian, spoon-shaped, late/post-orogenic collapse basins in western and mid Norway. We propose a model for the formation of the southwesternmost Nordkapp basin and its counterpart Devonian basin in the Gjesvær Low by exhumation of narrow, ENE-WSW to NE-SW trending basement ridges along a bowed portion of the Sørøya-Ingøya shear zone in the Mid/Late Devonian-early Carboniferous. Exhumation may have involved part of a large-scale metamorphic core complex that potentially included the Lofoten Ridge, the West Troms Basement Complex and the Norsel High. Finally, we argue that the Sørøya-Ingøya shear zone truncated and decapitated the Trollfjorden-Komagelva Fault Zone during the Caledonian Orogeny and that the western continuation of the Trollfjorden-Komagelva Fault Zone was mostly eroded and potentially partly preserved in basement highs in the SW Barents Sea.

## 1. Introduction

The SW Barents Sea margin is located near the Iapetus suture zone that formed when Laurentia collided with Fennoscandia to produce the Caledonian Orogeny (Ramberg et al., 2008; Gernigon et al., 2014). This suture and possibly related deep-seated shear zones, which accommodate e.g. thrust nappe emplacement during the Caledonian Orogeny, are now covered by late Paleozoic to Cenozoic sedimentary basins that formed during multiple episodes of extension. These repeated extension events led to the breakup of the North Atlantic Ocean and formation of a transform plate margin at the boundary between the Mid-Norwegian and SW Barents Sea margins (Faleide et al., 1993, 2008; Blystad et al., 1995; Doré et al., 1997; Bergh et al., 2007; Hansen et al., 2012; Gernigon et al., 2014). The rift-margin along the SW Barents Sea, offshore Western Troms and NW Finnmark (Figure 1), consists of the Finnmark Platform and an adjacent, glacial sediment-free strandflat, and of deep offshore basins such as the Hammerfest and Nordkapp basins (Gabrielsen et al., 1990). These basins are bounded by major NE-SW trending extensional faults such as the Troms-Finnmark Fault Complex (TFFC; Gabrielsen et al., 1990; Smelror et al., 2009; Indrevær et al., 2013), the Måsøy Fault Complex (MFC; Gabrielsen et al., 1990; Gudlaugsson et al., 1998), and potential basement-seated ductile

Formatted: Font: Not Bold

Formatted: Font: Not Bold, Not Italic, Check spelling and grammar

Formatted: Font: Not Bold

Formatted: Font: Not Bold, Not Italic, Check spelling and grammar

detachments (Figure 1). The study area also includes a deep Paleozoic basin that is located southwest of the Nordkapp Basin and east of the Hammerfest Basin, and which is bounded to the southwest by the WNW-ESE trending segment of the TFFC and to the southeast by the MFC (Figure 1). ~~This basin was named the “easternmost Hammerfest basin” by Omosanya et al. (2015). We find this name inappropriate and tentatively rename this basin the “southwesternmost Nordkapp basin”, as argued for later in the text.~~

~~In addition,~~ The SW Barents Sea margin off Western Troms and NW Finnmark is segmented by margin-oblique, NNW-SSE to WNW-ESE trending transfer fault zones, e.g. Senja Fracture Shear Zone and Fugløya transfer zone (Indrevær et al., 2013), which ~~are both sub-parallel~~ may represent analogs of the onshore, Neoproterozoic, WNW-ESE trending Trollfjorden-Komagelva Fault Zone (TKFZ) in eastern Finnmark (Siedlecki, 1980; Herrevold et al., 2009) and to the Kokelv Fault on the Porsanger Peninsula (Figure 1). ~~while the coastal Langfjord-Vargsund fault (LVF) trends NE-SW, parallel to the TFFC (Figure 1).~~ The TKFZ is believed to continue farther west, off the coast, where it is thought to interact with and merge into the WNW-ESE trending fault segment of the TFFC (Gabrielsen, 1984; Vorren et al., 1986; Townsend, 1987; Gabrielsen & Færseth, 1989; Gabrielsen et al., 1990; Roberts et al., 2011; Bergø, 2015; Lea, 2015). Onshore-nearshore, margin-parallel fault complexes include the Langfjord-Vargsund fault (LVF; Figure 1) trending NE-SW and possibly representing an analog to the TFFC and MFC. The geometric interaction, timing and controlling effects of the TFFC, MFC, TKFZ and LVF, and adjacent offshore basins and ridges are not yet resolved. In particular, the presence of potential Caledonian structures in the deeper portion of the Finnmark Platform, e.g. in the footwall of the TFFC (cf. Johansen et al., 1994; Gudlaugsson et al., 1998) is further explored in the present contribution.

The goal of this paper is to contribute to the understanding of tectonic and sedimentary processes in the Arctic in the Late Devonian-Carboniferous. To achieve this, we demonstrate the presence of an overall NE-SW trending, NW-dipping, basement-seated, low-angle shear zone on the Finnmark Platform, the Sørøya-Ingøya shear zone (SISZ; Figure 1), and to discuss its role played in shaping the SW Barents Sea margin during late/post-orogenic collapse of the Caledonides in late Paleozoic times and its influence on the formation and evolution of Devonian-Carboniferous collapse basins. We mapped and analyzed basin-bounding brittle faults on the Finnmark Platform and in the southwesternmost Nordkapp basin (named the easternmost

Formatted: Font: Not Bold

Formatted: Font: Not Bold, Not Italic, Check spelling and grammar

Formatted: Font: Not Bold

Formatted: Font: Not Bold, Not Italic, Check spelling and grammar

Formatted: Font: Not Bold

Formatted: Font: Not Bold, Not Italic, Check spelling and grammar

Formatted: Font: Not Bold

Formatted: Font: Not Bold, Not Italic, Check spelling and grammar

Formatted: Font: Not Bold

Formatted: Font: Not Bold, Not Italic, Check spelling and grammar

Formatted: Font: Not Bold

Formatted: Font: Not Bold, Not Italic, Check spelling and grammar

Formatted: Font: Not Bold

Formatted: Font: Not Bold, Not Italic, Check spelling and grammar

Formatted: Font: Not Bold

Formatted: Font: Not Bold, Not Italic, Check spelling and grammar

Hammerfest basin in Omosanya et al., 2015), such as the TFFC and the MFC (Figure 1, Figure 1, Figure 1), to evaluate the impact of the SISZ on post-Caledonian brittle faults. We aim at showing the importance of structural inheritance by examining the relationship between Precambrian-Caledonian structural grains, post-Caledonian fault trends and offshore sedimentary basin geometries. Minor Carboniferous grabens and half-grabens on the Finnmark Platform (e.g. the Sørvær Basin; Figure 1, Figure 1, Figure 1), which are thought to have formed during early stages of extension shortly after the end of the Caledonian Orogeny (Lippard & Roberts, 1987; Olesen et al., 1990; Johansen et al., 1994; Bugge et al., 1995; Gudlaugsson et al., 1998; Roberts et al., 2011), are of particular importance to the present work. We further investigate the presence of possible Devonian sedimentary deposits on the Finnmark Platform and in the southwesternmost Nordkapp basin and tentatively interpret them as potential analogs to Middle Devonian basins in western Norway (Séranne et al., 1989; Chauvet & Séranne, 1994; Osmundsen & Andresen, 2001) and mid-Norway (Braathen et al., 2000). In this context, NE-SW to ENE-WSW trending basement ridges in the footwall of the TFFC and on the northern flank of the southwesternmost Nordkapp basin are described and analyzed, and we compare them to adjacent basement highs such as the Norsel High (Figure 1, Figure 1, Figure 1; Gabrielsen et al., 1990; Gudlaugsson et al., 1998), the West Troms Basement Complex (Zwaan, 1995; Bergh et al., 2010) and the Lofoten Ridge (Blystad et al., 1995; Bergh et al., 2007; Hansen et al., 2012). Finally, we propose a model of exhumation of these ENE-WSW to NE-SW trending basement ridges as a metamorphic core complex (cf. Lister & Davis, 1989) using shear zones in Lofoten-Vesterålen as onshore analogs for the SISZ (Steltenpohl et al., 2004; Osmundsen et al., 2005; Steltenpohl et al., 2011).

## 2. Geological setting

The bedrock geology of the SW Barents Sea margin (Figure 1, Figure 1, Figure 1) consists of (i) an Archean to Paleoproterozoic basement suite, the West Troms Basement Complex (Zwaan, 1995; Bergh et al., 2010), (ii) locally preserved autochthonous Neoproterozoic cover sequences (Kirkland et al., 2008), (iii) a series of Caledonian thrust nappes (Andersen, 1981; Ramsay et al., 1985; Corfu et al., 2014), and (iv) late Paleozoic to Cenozoic sedimentary sequences offshore (Faleide et al., 1993, 2008; Gudlaugsson et al., 1998; Worsley, 2008; Smelror et al., 2009; Figure 1, Figure 1, Figure 1). Archean to Paleoproterozoic basement rocks are mostly exposed in major horsts and ridges in Western Troms (Bergh et al., 2010; Indrevær et al., 2013; Indrevær & Bergh,

Formatted: Font: Not Bold

Formatted: Font: Not Bold, Not Italic, Check spelling and grammar

Formatted: Font: Not Bold

Formatted: Font: Not Bold, Not Italic, Check spelling and grammar

Formatted: Font: Not Bold

Formatted: Font: Not Bold, Not Italic, Check spelling and grammar

Formatted: Font: Not Bold

Formatted: Font: Not Bold, Not Italic, Check spelling and grammar

Formatted: Font: Not Bold

Formatted: Font: Not Bold, Not Italic, Check spelling and grammar

Formatted: Font: Not Bold

Formatted: Font: Not Bold, Not Italic, Check spelling and grammar

Formatted: Font: Not Bold

Formatted: Font: Not Bold, Not Italic, Check spelling and grammar

Formatted: Font: Not Bold

Formatted: Font: Not Bold, Not Italic, Check spelling and grammar

Formatted: Font: Not Bold

Formatted: Font: Not Bold, Not Italic, Check spelling and grammar

Formatted: Font: Not Bold

Formatted: Font: Not Bold, Not Italic, Check spelling and grammar

2014), whereas Neoproterozoic and Caledonian rocks dominate in the eastern part of Troms and in  
125 NW Finnmark (Kirkland et al., 2008; Corfu et al., 2014; Indrevær & Bergh, 2014; ~~Figure 1~~  
~~Figure 1~~). In offshore areas adjacent to Western Troms and NW Finnmark, extensive post-  
Caledonian normal faulting led to the formation of large sedimentary basins that are filled with  
thick, late Paleozoic to Cenozoic deposits related to the post-orogenic collapse of the Caledonides  
and to the opening of the NE Atlantic Ocean (Faleide et al., 1993, 2008; Gudlaugsson et al., 1998;  
130 Worsley, 2008; Smelror et al., 2009). Late Paleozoic-Cenozoic sedimentary units are missing in  
onshore areas of Troms and Finnmark likely due to erosion and/or non-deposition (Ramberg et al.,  
2008; Smelror et al., 2009).

## 2.1. Onshore Precambrian and Caledonian geology

### 2.1.1. Precambrian basement rocks

The Western Troms margin is characterized by Archean to Paleoproterozoic basement  
rocks of the West Troms Basement Complex (Bergh et al., 2010) that are preserved and exposed  
in a horst block formed during post-Caledonian extension (Indrevær et al., 2013). The West Troms  
140 Basement Complex consists of tonalitic, trondhjemitic and granitic gneisses, metasupracrustal  
rocks and mafic and felsic igneous rocks (Corfu et al., 2003; Bergh et al., 2010). These rocks were  
deformed during the Svecofennian orogeny, which resulted in the formation of NW-SE trending  
steep foliation, ductile shear zones and upright and vertical macrofolds, only weakly reworked  
during the Caledonian Orogeny (Corfu et al., 2003; Bergh et al., 2010).

145 In NW Finnmark, Paleoproterozoic basement rocks occur in several tectonic windows of  
the Caledonides, e.g. Repparfjord-Komagfjord and Alta-Kvænangen tectonic windows (Zwaan &  
Gautier, 1980; Pharaoh et al., 1982; 1983; Bergh & Torske, 1988; ~~Figure 1~~), and consist of low-  
grade supracrustal metavolcanics and metasedimentary rocks of the Raipas Group. These  
Greenstone belts formed ~~in as~~ NW-SE trending rift basins in the Archean?-Paleoproterozoic during  
150 the opening of the Kola Ocean (Bergh & Torske, 1986; 1988), although more recent studies  
tentatively reinterpret these rocks as foreland basin deposits derived from the Svecokarelian  
Orogeny (Torske & Bergh, 2004). A thin cover of Neoproterozoic to Cambrian (para-)  
autochthonous metasedimentary rocks occurs on top of ~~the~~ Paleoproterozoic basement  
~~rocks~~ windows. ~~This unit is correlated with the autochthonous Tanafjord-Varangerfjord Group in~~

Formatted: Font: Not Bold

Formatted: Font: Not Bold, Not Italic, Check spelling and grammar

Formatted: Font: Not Bold

Formatted: Font: Not Bold, Not Italic, Check spelling and grammar

Field Code Changed

Formatted: Font: Not Bold

Formatted: Font: Not Bold, Not Italic

155 ~~eastern Finnmark (Siedlecki, 1980; ), as well as with the Lower Allochthonous Gaissa and~~  
~~Laksefjord Nappes (Ramsay et al., 1985; Andresen et al. 2014; Corfu et al., 2014).~~

160 ~~Another Other Neoproterozoic-Ordovician units in eastern Finnmark, include~~  
~~metasedimentary rocks of the Barents Sea and Tanafjorden-Varangerfjorden regions-Group~~  
~~(Siedlecki, 1980; Siedlecka & Roberts, 1992); is which are exposed in the outer part of on the~~  
~~Varanger Peninsula (Figure 1, Figure 1, Figure 1). The rocks of the Barents Sea Group were deposited~~  
~~in a large scale foreland basin during the Timanian Orogeny (Andresen et al., 2014) and a~~  
~~Cryogenian depositional age was inferred from fossil bearing assemblages (Corfu et al., 2014).~~

165 The Timanian Orogeny produced major NW-SE trending folds (Roberts & Siedlecka,  
2002) and WNW-ESE trending fault complexes like the TKFZ (Jonhson et al., 1978; Herrevold et  
al., 2009). The TKFZ was mapped as a narrow, single-segment fault strand all the way ~~from along~~  
~~the Kola Peninsula in Russia in the east, where it merges with the Sredni-Rybachy Fault Zone~~  
~~(Roberts et al., 1997; Roberts et al., 2011), to the Barents shelf in the west (Gabrielsen, 1984;~~  
~~Gabrielsen & Færseth, 1989; Gabrielsen et al., 1990; Roberts et al. 2011) to the east of the Kola~~  
170 ~~Peninsula in Russia (Roberts et al., 1997). Between these areas, the TKFZ is traced along the Kola~~  
~~Peninsula as the Sredni Rybachy Fault Zone (Roberts et al., 2011). We present an alternative model~~  
~~in which the TKFZ splays into multiple fault segments and dies out between the Varanger~~  
~~Peninsula and the Barents shelf.~~ On the Varanger Peninsula, the TKFZ is well displayed on satellite  
and DEM images, but is generally poorly exposed. In map view, the TKFZ is irregular, with  
175 different structural segments and branching subsidiary faults both across- and along-strike, locally  
showing duplex structures (Siedlecka & Siedlecki, 1967; Siedlecka, 1975). The TKFZ formed  
along the southwestern boundary of the Timanian Orogeny in the late Cryogenian-Ediacaran  
(Roberts & Siedlecka, 2002; Siedlecka et al., 2004), and was later reactivated as a strike-slip fault  
during the Caledonian Orogeny when it accommodated significant lateral displacement constrained  
to 200-250 km of dextral strike-slip movement (Bylund, 1994; Rice, 2013).

### 180 2.1.2. Caledonian ~~rocks~~nappes

Coastal areas of NW Finnmark are dominated by Caledonian thrust sheets of the Kalak  
Nappe Complex and Magerøy Nappe (Ramsay et al., 1985; Ramberg et al., 2008; Corfu et al.,  
2014), formed in the Neoproterozoic through Silurian (Figure 1, Figure 1, Figure 1). The Kalak  
185 Nappe Complex is composed of amphibolite facies schists, metapsammites and paragneisses, and

Formatted: Font: Not Bold

Formatted: Font: Not Bold, Not Italic, Check spelling and grammar

Formatted: Font: Not Bold

Formatted: Font: Not Bold, Not Italic, Check spelling and grammar

Formatted: Font color: Auto

Formatted: Font: Not Bold

Formatted: Font: Not Bold, Not Italic

Formatted: Font: Not Bold

Formatted: Font: Not Bold, Not Italic

190 comprises several allochthonous thrust sheets with Proterozoic basement rocks, clastic  
metasedimentary rocks, and plutonic rocks of the Seiland Igneous Province (Corfu et al., 2014). A  
major thrust defines the contact with the underlying pre-Caledonian basement (Ramsey et al.,  
1985). Dominant structures include a gently NW-dipping foliation, NNE-SSW trending, east-  
verging, asymmetrical recumbent folds and low-angle thrusts that accommodated top-to-the-ESE  
shortening (Townsend, 1987a; Kirkland et al., 2005). The Kalak Nappe Complex was previously  
considered to represent likely corresponds to an exotic terrane that was accreted on the Laurentian  
margin of Rodinia, prior to the rifting linked to the opening of the Iapetus Ocean, and to have later  
been thrust over Baltica during the Caledonian Orogeny (Kirkland et al., 2008). However,  
195 paleocurrent and geochronological data suggest these rocks to be of Baltican origin (Roberts, 2007;  
Zhang et al., 2016).

200 The Seiland Igneous Province corresponds to a large, late Neoproterozoic mafic and  
ultramafic intrusion linked to the early-mid rifting stages of the Iapetus Ocean (Elvevold et al.,  
1994; Corfu et al., 2014). Recent geophysical studies by Pastore et al. (2016) show that the base of  
the Seiland Igneous Province defines two deep-reaching roots located below the islands of Seiland  
and Sørøya constraining the thickness of the Kalak Nappe Complex in this area to a maximum of  
10 km. On the Porsanger and Varanger Peninsula, ENE-WSW to NNE-SSW trending, Ediacaran  
metadolerite dyke swarms are particularly common, and they are as well associated to the rifting  
of the Iapetus Ocean (cf. Roberts, 1972; Siedlecka et al., 2004; Nasuti et al., 2015).

205 The Kalak Nappe Complex is structurally overlain by the Magerøy Nappe, which consists  
of Late Ordovician to early Silurian greenschist facies metasedimentary and metaplutonic rocks  
(Andersen, 1981; 1984; Corfu et al., 2014) that crop out on the island of Magerøya (Figure 1  
Figure 1). The Magerøy Nappe is characterized by asymmetrical, NNE-SSW trending, east-  
verging folds and low-angle, NW- and SE-dipping thrusts similar in trend to those observed within  
210 the Kalak Nappe Complex (Andersen, 1981), and is intruded by granitic and gabbroic plutons, e.g.  
the Silurian Honningsvåg Igneous Complex (Corfu et al., 2006) and the Finnvik Granite (Andersen,  
1981). Remnants of the Magerøy Nappe thrust units are also found in northeastern Sørøya and on  
the Porsanger Peninsula (Kirkland et al., 2005; 2007; Corfu et al., 2014; Figure 1  
Figure 1  
Figure 1  
Figure 1).  
215

In nearshore areas of NW Finnmark, along the coasts of Sørøya and Ingøya, we identified  
on seismic sections a large NE-SW trending, dominantly NW dipping zone of weakness below

Formatted: Font: Not Bold

Formatted: Font: Not Bold, Not Italic, Check spelling and grammar

Formatted: Font: Not Bold

Formatted: Font: Not Bold, Not Italic, Check spelling and grammar

Formatted: Font: Not Bold

Formatted: Font: Not Bold, Not Italic, Check spelling and grammar

Formatted: Font: Not Bold

Formatted: Font: Not Bold, Not Italic, Check spelling and grammar

220 post-Caledonian basin and faults that we tentatively interpret as a major Caledonian shear zone, which we name the Sørøya-Ingøya shear zone (Figure 1). This large weakness zone has not been described in scientific literature and we therefore proceed by describing its geometry and potential kinematics based on offshore seismic data.

## 2.2. Post-Caledonian brittle faults and basins

### 2.2.1. Post-Caledonian offshore basins

225 The SW Barents Sea margin was subjected to multiple episodes of extensional faulting after the end of the Caledonian Orogeny, starting with the collapse of the Caledonides in the Mid/Late Devonian-early Carboniferous, and lasting until the early/mid Permian, although evidence of this stage is only preserved onshore western and mid-Norway (Séranne et al., 1989; Chauvet & Séranne, 1994; Braathen et al., 2000; Osmundsen & Andresen, 2001). During this period, basement ridges in Lofoten-Vesterålen (Klein & Steltenpohl, 1999; Klein et al., 1999; Steltenpohl et al., 230 2004; 2011; Figure 1) and in mid-Norway (Osmundsen et al., 2005; Figure 1) were exhumed as metamorphic core complexes, synchronously with the development of large half-graben basins such as the Vøring and Møre basins in mid-Norway (Blystad et al., 1995) and the Hammerfest, Nordkapp and Ottar basins in the SW Barents Sea (Gabrielsen et al., 1990; Breivik et al., 1995; 235 Gudlaugsson et al., 1998; Indrevær et al., 2013; Figure 1, Figure 1, Figure 1). The main rifting events occurred in the Late Jurassic and peaked in the Early Cretaceous, when major offshore basins such as the Tromsø and Harstad basins formed. The rifting ended with full breakup of the North Atlantic Ocean and formation of a transform plate margin in the SW Barents Sea at the Paleocene-Eocene transition (Faleide et al., 1993; 2008).

240 Off the coasts of Western Troms and NW Finnmark, the SW Barents Sea margin is characterized by a relatively shallow area, the Finnmark Platform (Gabrielsen et al., 1990; Figure 1, Figure 1, Figure 1), which is thought to have remained relatively stable since late Paleozoic times. For example, the inner part of the Finnmark Platform, here referred to as the Finnmark Platform east (Figure 1, Figure 1, Figure 1), was only affected by the formation of minor Carboniferous, ENE- 245 WSW to NE-SW trending half-graben and graben structures (Bugge et al., 1995; Samuelsen et al., 2003; Rafaelsen et al., 2008; Figure 1, Figure 1, Figure 1). In the hanging-wall of the MFC on the western part of the Finnmark Platform, the Finnmark Platform west (Figure 1, Figure 1, Figure 1),

Formatted: Font: Not Bold

Formatted: Font: Not Bold, Not Italic, Check spelling and grammar

Formatted: Font: Not Bold

Formatted: Font: Not Bold, Not Italic, Check spelling and grammar

Formatted: Font: Not Bold

Formatted: Font: Not Bold, Not Italic, Check spelling and grammar

Formatted: Font: Not Bold

Formatted: Font: Not Bold, Not Italic, Check spelling and grammar

Formatted: Font: Not Bold

Formatted: Font: Not Bold, Not Italic, Check spelling and grammar

Formatted: Font: Not Bold

Formatted: Font: Not Bold, Not Italic, Check spelling and grammar

Formatted: Font: Not Bold

Formatted: Font: Not Bold, Not Italic, Check spelling and grammar

Formatted: Font: Not Bold

Formatted: Font: Not Bold, Not Italic, Check spelling and grammar

Formatted: Font: Not Bold

Formatted: Font: Not Bold, Not Italic, Check spelling and grammar

Formatted: Font: Not Bold

Formatted: Font: Not Bold, Not Italic, Check spelling and grammar

Formatted: Font: Not Bold

Formatted: Font: Not Bold, Not Italic, Check spelling and grammar

Formatted: Font: Not Bold

Formatted: Font: Not Bold, Not Italic, Check spelling and grammar





northwest are juxtaposed against Precambrian basement rocks of the Repparfjord-Komagfjord and Alta-Kvænangen tectonic windows in the southeast (Figure 1, Figure 1, Figure 1).

The NW Finnmark margin is located along the northeastward prolongation of the Lofoten-Vesterålen and Western Troms segments of the Norwegian continental shelf (Figure 1, Figure 1, Figure 1). Similar fault sets and trends as in Lofoten-Vesterålen exist in Finnmark and their interaction is thought to partly have controlled the rhombic geometry of many offshore sedimentary basins (Bergh et al., 2007; Indrevær et al., 2013). A typical example along the Western Troms and NW Finnmark margins is the NW-dipping TFFC, which bounds the Harstad Basin to the east and the Hammerfest Basin to the southeast (Gabrielsen et al., 1990; Indrevær et al., 2013). The TFFC defines a system of irregular branching faults trending NNE-SSW and ENE-WSW and terminating as a WNW-ESE trending fault zone northwest of the island of Magerøya where it merges with the NE-SW trending, NW-dipping MFC at the southeastern boundary of the Nordkapp Basin (Gabrielsen et al., 1990) and of the triangular-shaped southwesternmost Nordkapp basin (Omosanya et al., 2015; Figure 1, Figure 1, Figure 1). We address a possible genetic relationship and structural inheritance of the post-Caledonian MFC with the Caledonian SISZ and argue that the MFC may have initiated as an extensional splay during the reactivation of the SISZ as an extensional detachment during the late/post-orogenic collapse of the Caledonides. Furthermore, we tentatively link basement ridges such as the Norsel High in the footwall of the Nysleppen Fault Complex (Gabrielsen et al., 1990) to bowed segments of the SISZ (Figure 1, Figure 1, Figure 1).

### 2.2.3. Post-Caledonian transfer zones

The Norwegian continental shelf is segmented by transfer fault zones of which the largest is the offshore De Geer Zone (Faleide et al., 1984; 2008; Cianfarra & Salvini, 2015), which main fault segment is the Hornsund Fault Zone, an offshore NNW-SSE trending fault that runs parallel to the west coast of Spitsbergen and separates the SW Barents Sea margin from the Lofoten-Vesterålen Margin (Figure 1, Figure 1, Figure 1). In the south, the De Geer Zone proceeds through the Senja Fracture Zone and into the Senja Shear Belt onshore the island of Senja (Figure 1, Figure 1, Figure 1). Olesen et al. (1993; 1997) suggested shifts of polarity of the Vestfjorden-Vanna Fault Complex along the Senja Fracture Zone, and they argued that the formation of the Senja Fracture Zone offshore was controlled by a major onshore basement weakness zone, the Bothnian-Senja Fault Complex (Figure 1), which provided suitably oriented basement heterogeneities for the

Formatted: Font: Not Bold

Formatted: Font: Not Bold, Not Italic, Check spelling and grammar

Formatted: Font: Not Bold

Formatted: Font: Not Bold, Not Italic, Check spelling and grammar

Formatted: Font: Not Bold

Formatted: Font: Not Bold, Not Italic, Check spelling and grammar

Formatted: Font: Not Bold

Formatted: Font: Not Bold, Not Italic, Check spelling and grammar

Formatted: Font: Not Bold

Formatted: Font: Not Bold, Not Italic, Check spelling and grammar

Formatted: Font: Not Bold

Formatted: Font: Not Bold, Not Italic, Check spelling and grammar

Formatted: Font: Not Bold

Formatted: Font: Not Bold, Not Italic, Check spelling and grammar

Formatted: Font: Not Bold

Formatted: Font: Not Bold, Not Italic, Check spelling and grammar

Formatted: Font: Not Bold

Formatted: Font: Not Bold, Not Italic, Check spelling and grammar

Formatted: Font: Not Bold

Formatted: Font: Not Bold, Not Italic, Check spelling and grammar

Formatted: Font: Not Bold

Formatted: Font: Not Bold, Not Italic, Check spelling and grammar

Formatted: Font: Not Bold

Formatted: Font: Not Bold, Not Italic, Check spelling and grammar

Formatted: Font: Not Bold

Formatted: Font: Not Bold, Not Italic, Check spelling and grammar

development of a transfer zone (e.g. Doré et al., 1997). Similarly, Indrevær et al. (2013) proposed the existence of a fault array termed the Fugløya transfer zone to explain offsets and shifts of polarity along the Vestfjorden-Vanna Fault Complex farther northeast in Western Troms (Figure 1). The Fugløya transfer zone trends N-S/NNW-SSE and continues onshore Western Troms, where it merges with the NW-SE trending Bothnian-Kvænangen Fault Complex, and offshore where it is thought to merge into the TFFC and the Ringvassøy-Loppa Fault Complex (Indrevær et al., 2013; Figure 1, Figure 1, Figure 1).

Analogously in NW Finnmark, the WNW-ESE trending TKFZ seems to merge into a basin-bounding fault, in this case the WNW-ESE trending, NE-dipping fault segment of the TFFC (Gabrielsen, 1984; Gabrielsen & Færseth, 1989; Roberts et al., 2011). In nearshore areas of NW Finnmark, the TKFZ is thought to proceed offshore and seems to correlate with a large escarpment north of Magerøya and into the Barents Sea (Vorren et al., 1986; Townsend, 1987b). In the area where it terminates, it merges and links up with the TFFC to form triangular-shaped mini-basins (Gabrielsen, 1984; Gabrielsen & Færseth, 1989; Roberts et al., 2011). We explore an alternative origin for the WNW-ESE trending fault segment of the TFFC and further examine its interaction with the onshore-nearshore TKFZ, which potentially acted as a transfer fault after the Caledonian Orogeny and contributed to offset the LVF onshore Magerøya and in adjacent coastal areas (Koehl et al., submitted; Figure 1, Figure 1, Figure 1). Other major WNW-ESE trending faults exist offshore, northeast of the Varanger Peninsula, and these bound the Tiddlybanken Basin, a large WNW-ESE trending basin that formed in Carboniferous times (Mattingsdal et al., 2015; Figure 1, Figure 1, Figure 1).

#### 2.2.4. Absolute age dating of post-Caledonian faultings

The absolute age of post-Caledonian brittle faults onshore NW Finnmark is poorly constrained although a few contributions provide valid insights (Lippard & Prestvik, 1997; Davids et al., 2013; Torgersen et al., 2014; Koehl et al., 2016). Torgersen et al. (2014) performed K/Ar dating of brittle fault gouge in the footwall of the LVF and obtained dominantly Carboniferous to early Permian ages, as well as a subsidiary Early Cretaceous age for one of the faults. Roberts et al. (1991) and Lippard & Prestvik (1997) presented indirect evidence of early Carboniferous dolerite dykes emplaced along and cementing WNW-ESE trending brittle fault segments of the TKFZ onshore Magerøya, thus providing a minimum estimate for the latest stage of faulting along

Formatted: Font: Not Bold

Formatted: Font: Not Bold, Not Italic, Check spelling and grammar

Formatted: Font: Not Bold

Formatted: Font: Not Bold, Not Italic, Check spelling and grammar

Formatted: Font: Not Bold

Formatted: Font: Not Bold, Not Italic, Check spelling and grammar

Formatted: Font: Not Bold

Formatted: Font: Not Bold, Not Italic, Check spelling and grammar

Formatted: Font: Not Bold

Formatted: Font: Not Bold, Not Italic, Check spelling and grammar

Formatted: Font: Not Bold

Formatted: Font: Not Bold, Not Italic, Check spelling and grammar

Formatted: Font: Not Bold

Formatted: Font: Not Bold, Not Italic, Check spelling and grammar

340 [this fault](#). These dykes produce high positive aeromagnetic anomalies (Nasuti et al., 2015) and may  
be used to further identify brittle faults in NW Finnmark. Late Devonian dolerite dykes emplaced  
along brittle faults that trend NE-SW and N-S have been identified and dated in eastern Varanger  
Peninsula (Guise & Roberts, 2002) and on the Kola Peninsula (Roberts & Onstott, 1995). By  
comparison, Davids et al. (2013) obtained Late Devonian-early Carboniferous ages from K/Ar  
345 dating of illite clay minerals for early extensional faulting along the Vestfjorden-Vanna Fault  
Complex and related faults in Lofoten-Vesterålen and Western Troms.

### 2.3. Offshore sedimentary successions and well-ties

350 Deep fault-bounded basins formed along the SW Barents Sea margin during successive  
extension events in late Paleozoic-early Cenozoic times, and- these basins contain important  
sedimentary successions for hydrocarbon exploration. We particularly focus on the late Paleozoic  
succession [\(Figure 3Figure 3\)](#) which sedimentary rocks were deposited on top of eroded  
Precambrian and Caledonian basement rocks (cf. Townsend, 1987a; Johansen et al., 1994; Bugge  
355 et al., 1995; Zwaan, 1995; Gudlaugsson et al., 1998; Samuelsen et al., 2003; Bergh et al., 2010).  
Late Paleozoic sedimentary deposits in the study area were penetrated by only a few exploration  
wells to which we tied our seismic interpretation [\(Figure 2\)](#). ~~These wells include exploration wells  
7120/12-4, 7124/3-1, 7128/4-1 and 7128/6-1, and shallow drill-cores 7127/10-U-2 and 7127/10-  
U-3 from Bugge et al. (1995; Figure 2).~~ Overlying Mesozoic to Cenozoic sedimentary units were  
360 not investigated and are better described in Omosanya et al. (2015).

The nature and age of basement rocks along the SW Barents Sea margin remain relatively  
complex to resolve since only a handful of wells drilled through the thick post-Caledonian  
sedimentary cover. Nevertheless, wells 7128/4-1 and 7128/6-1 penetrated quartzitic  
metasedimentary rocks on the Finnmark Platform east [\(Figure 2Figure 2Figure 2\)](#) and these are  
365 believed to correlate with upper Proterozoic rocks involved in Caledonian thrusting in northern  
Finnmark (Røe & Roberts, 1992).

Devonian sedimentary rocks are yet to be reported in North Norway and along the SW  
Barents Sea margin [\(Figure 3Figure 3\)](#). ~~However,~~ Devonian sedimentary deposits ~~however~~ are  
present in western Norway (Osmundsen & Andersen, 2001) where they represent a several km-  
370 thick succession made up with clastic deposits that notably include rhythmic sandstone and coarse-

Formatted: Font: Not Bold, Not Italic

Formatted: Font: Not Bold, Not Italic

Field Code Changed

Formatted: Font: Not Bold

Formatted: Font: Not Bold, Not Italic, Check spelling and grammar

Formatted: Font: Not Bold

Formatted: Font: Not Bold, Not Italic, Check spelling and grammar

Formatted: Font: Not Bold

Formatted: Font: Not Bold, Not Italic, Check spelling and grammar

Formatted: Font: Not Bold, Not Italic

Formatted: Font: Not Bold, Not Italic

grained conglomerate units. ~~These that~~ were deposited in the hanging-wall of ~~a~~ major, low-angle extensional shear zones, e.g. the Nordfjord-Sogn Detachment Zone (Séranne et al., 1989; Wilks & Cuthbert, 1994; Osmundsen & Andersen, 2001).

Lower Carboniferous sedimentary rocks of the Billefjorden Group directly overlie basement rocks on the Finnmark Platform east ~~as~~ evidenced by exploration wells 7128/4-1 and 7128/6-1 (Larssen et al., 2002; ~~Figure 2~~~~Figure 2~~~~Figure 2~~ & ~~Figure 3~~~~Figure 3~~). These rocks mostly correspond to fluvial clastic deposits interbedded with coal-bearing sedimentary rocks that correlate with contemporaneous deposits onshore Bjørnøya (Cutbill & Challinor, 1965; Gjelberg, 1981, 1984) and Spitsbergen (Cutbill & Challinor, 1965; Cutbill et al., 1976; Gjelberg, 1984). The total thickness of Billefjorden Group sedimentary deposits evidenced by exploration wells on horst-blocks on the Finnmark Platform east ranges from 350 m to 450 m. However, in the hanging-wall of a minor normal fault interpreted by Bugge et al. (1995) near the coast of northern Finnmark (~~Figure 2~~~~Figure 2~~~~Figure 2~~), shallow drill-cores 7127/10-U-2 and 7127/10-U-3 indicate that the thickness of lower Carboniferous sedimentary rocks reaches a thickness > 600 m within a NE-SW trending mini-basin on the Finnmark Platform east near the coast of the Nordkinn Peninsula (cf. star symbol in ~~Figure 1~~~~Figure 1~~~~Figure 1~~ & ~~Figure 2~~~~Figure 2~~~~Figure 2~~). In the Serpukhovian, fluvial sediments of the Billefjorden Group were gradually replaced by shallow marine sediments of the Gipsdalen Group from which they are generally separated by a mid-Carboniferous (Serpukhovian) unconformity (Cutbill et al., 1976; Gjelberg, 1984; ~~Bugge et al., 1995~~) potentially related to a global sea-level fall (Saunders & Ramsbottom, 1986). ~~This unconformity was recognized on the Finnmark Platform east by Bugge et al. (1995).~~

Shallow marine sedimentary deposits of the Gipsdalen Group are widespread along the SW Barents Sea margin and have proven prolific for hydrocarbon exploration (Larssen et al., 2002; ~~Figure 3~~~~Figure 3~~). Thus, this sedimentary succession benefits from a relatively high number of well penetrations and, as a result, its lateral facies and ~~lateral~~-thickness variations are well-constrained (~~Gjelberg & Steel, 1981, 1983~~; Samuelsen et al., 2003; Rafaelsen et al., 2008). The Gipsdalen Group was notably penetrated by wells 7128/4-1 and 7128/6-1 on the Finnmark Platform east, by well 7120/12-4 on the Finnmark Platform west and by well 7124/3-1 on the northern flank of southwesternmost Nordkapp basin (Larssen et al., 2002; ~~Figure 2~~~~Figure 2~~~~Figure 2~~). ~~Sedimentary strata of the Gipsdalen Group were tied to their stratigraphic equivalent onshore Bjørnøya and Spitsbergen (Gjelberg & Steel, 1981, 1983; Gjelberg, 1984; McCann & Dallmann, 1996).~~ This

Formatted: Font: Not Bold

Formatted: Font: Not Bold, Not Italic, Check spelling and grammar

Formatted: Font: Not Bold

Formatted: Font: Not Bold, Not Italic, Check spelling and grammar

Formatted: Font: Not Bold, Not Italic

Formatted: Font: Not Bold, Not Italic

Formatted: Font: Not Bold

Formatted: Font: Not Bold, Not Italic, Check spelling and grammar

Formatted: Font: Not Bold

Formatted: Font: Not Bold, Not Italic, Check spelling and grammar

Formatted: Font: Not Bold

Formatted: Font: Not Bold, Not Italic, Check spelling and grammar

Formatted: Font: Not Bold

Formatted: Font: Not Bold, Not Italic, Check spelling and grammar

Formatted: Font: Not Bold

Formatted: Font: Not Bold, Not Italic, Check spelling and grammar

Formatted: Font: Not Bold

Formatted: Font: Not Bold, Not Italic, Check spelling and grammar

Formatted: Font: Not Bold, Not Italic

Formatted: Font: Not Bold, Not Italic

Formatted: Font: Not Bold

Formatted: Font: Not Bold, Not Italic, Check spelling and grammar

Formatted: Font: Not Bold

Formatted: Font: Not Bold, Not Italic, Check spelling and grammar

405 succession consists of alluvial clastic sedimentary rocks ~~deposited on top of lower Carboniferous sedimentary deposits of the Billefjorden Group (McCann & Dallmann, 1996). In the upper part of the Gipsdalen Group, alluvial clastic sedimentary rocks~~ that are progressively replaced upwards by shallow marine platform carbonates interbedded with clastic and evaporite deposits (McCann & Dallmann, 1996). In well 7124/3-1 (Figure 2), Asselian evaporite deposits typically include thin layers of anhydrite and gypsum, but thicker, halite-rich end-members are found along the flanks of the Nordkapp Basin and southwesternmost Nordkapp basin where large pillows of upper Carboniferous ~~and~~ lower Permian salt were observed (Gabrielsen et al., 1992; Jensen & Sørensen, 1992; Koyi et al., 1993; Nilsen et al., 1995; Gudlaugsson et al., 1998; Koehl et al., 2017). In the Nordkapp Basin, pre-Permian deposits may in places reach a thickness of up to 7-8 km (Gudlaugsson et al., 1998). These deposits are composed of thick clastic sedimentary rocks and of upper Carboniferous to lower Permian evaporite deposits characterized by mobile salt that was involved in salt tectonism in the southwesternmost Nordkapp basin (Gudlaugsson et al., 1998; Koehl et al. 2017) and in the Nordkapp Basin (Gabrielsen et al., 1992; Jensen & Sørensen, 1992; Koyi et al., 1993; Nilsen et al., 1995).

420 ~~In the present work, we renamed the sedimentary basin located at the intersection of the TFFC and MFC (Figure 1) as the “southwesternmost Nordkapp basin” instead of the “easternmost Hammerfest basin” as proposed by Omosanya et al. (2015). The reason is that this basin shows more geometric similarity to the Nordkapp Basin than the Hammerfest Basin and must be treated as a separate basin (see further arguments later).~~

### 3. Methods & databases

#### 425 3.1. Seismic data and well-ties

430 The seismic interpretation shown in this study is based on publicly available 2D and 3D data from the DISKOS database, thus providing reasonably tight 2D data coverage. However, only one seismic 3D survey was available in the study area. The interpretation of seismic data aims at providing good constraints for the extent and geometry of offshore brittle faults and for offshore stratigraphy on the Finnmark Platform and in the southwesternmost Nordkapp basin. The present study uses ties to wells 7120/12-4, 7128/4-1 and 7128/6-1 and 7124/3-1 based on publicly available

Formatted: Font: Not Bold

Formatted: Font: Not Bold, Not Italic, Check spelling and grammar

Formatted: Font: Not Bold

Formatted: Font: Not Bold, Not Italic, Check spelling and grammar

435 [well data \(www.npd.no\)](http://www.npd.no) and [private well-tie seismograms \(Henningesen, pers. comm.\)](#) and to  
440 [shallow drill-cores 7127/10-U-2 and 7127/10-U-3 from Bugge et al. \(1995; Figure 2\)](#). Seven  
seismic profiles from the BSS01 2D seismic survey were used to analyze and describe offshore  
basin and fault geometries and provide the basis for discussion about the late Paleozoic evolution  
of the SW Barents Sea margin. Note that none of the seismic profiles used was depth-converted.  
Therefore, all relevant estimates of fault offsets and stratigraphic seismic unit thicknesses will be  
described in seconds (s) two-way time (TWT). [In addition, we analyzed two time-slice from 3D  
seismic survey MC3D-MFZ02 to constrain fault interaction in map-view.](#)

### 3.2. Aeromagnetic anomaly data

445 The offshore aeromagnetic data used in this study correspond to a compilation of the BASAR  
project of the Geological Survey of Norway (NGU) published by Gernigon & Brønner (2012) and  
Gernigon et al. (2014; [Figure 4](#)~~Figure 4~~[Figure 3](#)). The dataset is composed of tilt derivatives of  
aeromagnetic data and has been used to delineate possible magmatic intrusions (dykes) emplaced  
along brittle faults (cf. Nasuti et al., 2015) and abrupt changes of lithology generally recorded  
450 along the SW Barents Sea margin. However, data uncertainties arise from the fact that significantly  
different rock types may yield similar aeromagnetic responses. A crucial example in northern  
Finnmark is the similar high positive narrow aeromagnetic anomalies produced both by sub-  
vertical folded beds of metasedimentary rocks (Roberts & Siedlecka, 2012; Roberts & Williams,  
2013) and dolerite dykes intruded along brittle faults (Nasuti et al., 2015; [Figure 4](#)~~Figure 4~~[Figure](#)  
455 [3](#)). In order to distinguish such features, we carefully analyzed onshore geology in coastal areas of  
NW Finnmark and the results of exploration wells on the Finnmark Platform and adjacent offshore  
basins.

## 4. Results

### 4.1. Seismic interpretation of offshore basins and faults

#### 4.1.1. Seismic units and stratigraphy

Formatted: No underline

Formatted: Font: Not Bold

Formatted: Font: Not Bold, Not Italic, Check spelling and grammar

Formatted: Font: Not Bold

Formatted: Font: Not Bold, Not Italic, Check spelling and grammar

Formatted: Font: Not Bold

Formatted: Font: Not Bold, Not Italic, Check spelling and grammar

Formatted: Font: Not Bold

Formatted: Font: Not Bold, Not Italic, Check spelling and grammar

Formatted: Font: Not Bold

Formatted: Font: Not Bold, Not Italic, Check spelling and grammar











sediment cover (Solheim & Kristoffersen, 1984), and the seabed reflection (Figure 5Figure 5Figure 4). These reflections are penetrated by a large number of exploration wells and shallow drill-cores both on the Finnmark Platform and in the southwesternmost Nordkapp basin, where they all display consistently high seismic amplitudes (Faleide et al., 1984; Bugge et al., 1995; Gudlaugsson et al., 1998; Omosanya et al., 2015).

#### 4.1.2. Structural architecture of the Finnmark Platform and of the southwesternmost Nordkapp basin

In this section, we describe the most important structural elements of the Finnmark Platform and of the southwesternmost Nordkapp basin (cf. Figure 1Figure 1Figure 1 & Figure 2Figure 2Figure 2) based on interpreted key seismic sections (Figure 5Figure 5Figure 4). We also highlight the most dominant fault trends and their interaction with major structures such as the TFFC, MFC, TKFZ and SISZ to form offshore sedimentary basins.

##### *Faults and shear zones within basement rocks*

We identified a several km-thick, curved (in cross-section), shallow-dipping layer of moderate-amplitude reflections that we interpreted to represent a large-scale basement-seated shear zone, which we name the SISZ. The upper boundary surface of the SISZ (Figure 7Figure 7Figure 6) appears to be relatively shallow in coastal areas on the Finnmark Platform west. On the Finnmark Platform west, the SISZ dominantly dips to the NW but switches to a dominant dip to the northeast on the Finnmark Platform east. In the footwall of the MFC and in the southwestern part of the Finnmark Platform west, the SISZ occurs at relatively shallow depth (< 1.5 s TWT), and there it is believed to have been deeply eroded and is now overlain by a very thin sedimentary cover (cf. Figure 5Figure 5Figure 4c-f & Figure 6Figure 6Figure 5d). The SISZ shows significant lateral thickness variations that range from 2.0-2.5 seconds (TWT) near the coastline and in the footwall of the TFFC to 0.5 second (TWT) below the MFC and the TFFC (Figure 5Figure 5Figure 4f). The SISZ deepens to the northwest towards the center of the Finnmark Platform west before bending upwards in the footwall of the TFFC (Figure 5Figure 5Figure 4e & f). The SISZ then curves down where and merges with the listric TFFC merges with the shear zone at depth, thus delineating an elongated, NE-SW trending ridge in the footwall of the TFFC (cf. “basement highridges” in Figure 1Figure 1Figure 1 and Figure 5Figure 5Figure 4e & f). A similar pattern is observed in the

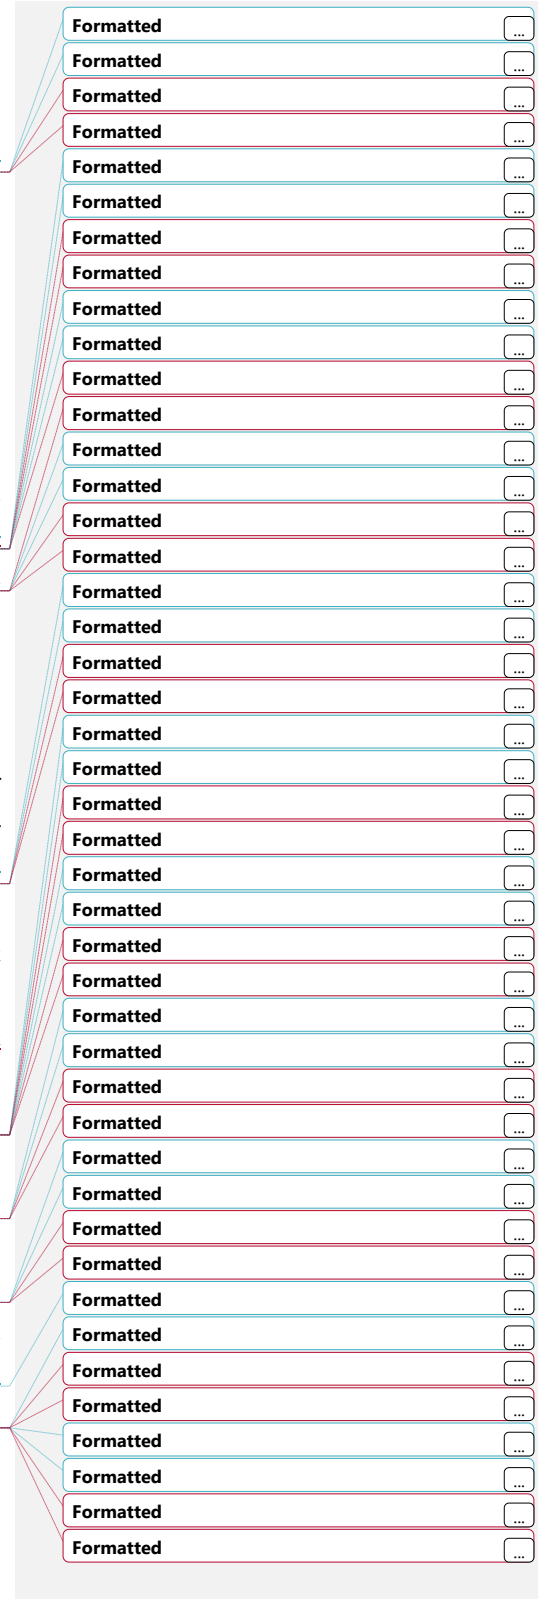















(cf. [Figure 5Figure 5Figure 4a & b](#)). In this graben structure, the lower Carboniferous and upper Carboniferous sedimentary successions thicken against the LVF ([Figure 5Figure 5Figure 4b](#)), while thickness variations become negligible farther north where the LVF dies out ([Figure 1Figure 1Figure 1](#) & [Figure 5Figure 5Figure 4a](#)). Consequently, similar thickness increases of lower Carboniferous and upper Carboniferous sedimentary strata elsewhere within graben and half-graben structures on the Finnmark Platform east suggest that syn-tectonic sediment deposition ~~occurred in Carboniferous times~~ along the LVF and analog ENE-WSW to NNE-SSW trending faults mostly occurred in Carboniferous times. Furthermore, in the footwall of the northern fault segments of the MFC, we recorded anomalously thick upper Carboniferous succession ([Figure 9Figure 9Figure 8b](#)) with a thickness comparable to what is observed within the southwesternmost Nordkapp basin ([Figure 9Figure 9Figure 8b](#)). This succession shows a half-ellipsoid shape in map-view with a NE-SW trending major axis parallel to the MFC ([Figure 9Figure 9Figure 8b](#)). We therefore argue that this thickness change on the Finnmark Platform east is the result of syn-tectonic sediment deposition in the hanging-wall of a NE-SW trending, SE-dipping fault antithetic to the MFC ([Figure 5Figure 5Figure 4a & b](#)). We suggest that the half-ellipsoid shape of the thickened upper Carboniferous sedimentary deposits on the Finnmark Platform east reflects large offset near the center of ~~a~~ the SE-dipping fault, and decreasing vertical throw towards the fault-tips, a feature characterizing syn-sedimentary, rift-related normal faults ([Figure 9Figure 9Figure 8b](#)).

By contrast, depositional sediment wedges may as well occur on the Finnmark Platform east, and they differ from fault-controlled thickness changes. One example is the ca. 600 m-thick lower Carboniferous succession evidenced by shallow drilling between the Nordkinn Peninsula and Magerøya (cf. “star” symbol in [Figure 1Figure 1Figure 1](#); Bugge et al., 1995), which we re-interpreted as a prograding Carboniferous sedimentary system ([Figure 6Figure 6Figure 5d](#)). The apparent thickening of the lower Carboniferous succession near the coasts of NW Finnmark is more likely to be related to sedimentary processes during the formation of large clinofolds in a prograding sedimentary system ([Figure 6Figure 6Figure 5d](#)) than to syn-tectonic deposition in the hanging-wall of a NE-SW trending, NW-dipping fault.

#### *Fault-controlled thickness changes in Permian strata*

In the southwesternmost Nordkapp basin and on the Finnmark Platform east and west, the Permian sedimentary succession is thin and shows a relatively constant thickness compared to the

Formatted: Font: Not Bold

Formatted: Font: Not Bold, Not Italic, Check spelling and grammar

Formatted

Formatted: Font: Not Bold

Formatted: Font: Not Bold, Not Italic, Check spelling and grammar

Formatted

Formatted: Font: Not Bold

Formatted

Formatted

Formatted: Font: Not Bold

Formatted: Font: Not Bold, Not Italic

Formatted

Formatted: Font: Not Bold

Formatted

Formatted

Formatted: Font: Not Bold

Formatted

Formatted

835 underlying Devonian-lower Carboniferous and upper Carboniferous successions ([Figure 5Figure 5Figure 4a-d](#) and [Figure 9Figure 9Figure 8a-c](#)). However, the Base Asselian and Base Triassic reflections marking the lower and upper boundary of the Permian succession show some offsets across the [main fault segment of the MFC, WNW-ESE trending segment of the TFFC and Rolvsøya fault](#), thus accounting for minor thickness variations in the Permian succession across [these faults](#) (840 [Figure 5Figure 5Figure 4c, d & g](#) and [Figure 9Figure 9Figure 8c](#)). We interpret these small offsets and thickness variations as the product of minor faulting activity in the Permian and mild Mesozoic reactivation of these faults, thus [This suggestings](#) that the main tectonic activity along [these Rolvsøya-faults](#) was essentially restricted to the Mid/Late Devonian-late Carboniferous (845 [Figure 5c, d & g](#)). Moreover, on the Finnmark Platform west and east, most brittle faults die out within the upper Carboniferous succession and only a few faults crosscut the Permian succession with limited amount of offset ([Figure 5Figure 5Figure 4a, b, e, & f](#)). ~~Across the TFFC and the MFC, the Base Asselian and Base Triassic reflections display small offsets, which we interpret as mild Mesozoic reactivation of these faults (Figure 4c, d & g).~~

#### 850 *Fault-controlled thickness changes in Mesozoic-Cenozoic strata*

Most faults observed within the late Paleozoic succession on the Finnmark Platform east and west and in the southwesternmost Nordkapp basin die out in the upper part of the succession before reaching the Base Triassic reflection ([Figure 5Figure 5Figure 4](#)). A few exceptions exist where the MFC and the WNW-ESE trending segment of the TFFC show small offsets of Mesozoic sedimentary strata (855 [Figure 5Figure 5Figure 4c-g](#)). The weak influence of these faults compared to offsets observed within late Paleozoic successions ([Figure 5Figure 5Figure 4c-g](#)) suggests that, at least some major faults were mildly reactivated in Mesozoic times but, in general, most brittle faults on the Finnmark Platform east and west and in the southwesternmost Nordkapp basin remained inactive after Carboniferous times.

#### 860 **4.2. Offshore aeromagnetic data**

To better verify our 2D interpretation of faults and basin architectures on the Finnmark Platform and in the southwesternmost Nordkapp basin, we compare and tie our results using high-resolution, offshore aeromagnetic data from Gernigon et al. (2014; [Figure 4Figure 4Figure 3](#)). 865



## 5. Discussion

Our regional and detailed seismic studies of basin-boundary faults such as the TFFC, MFC, Rolvsøya fault and TKFZ on the Finnmark Platform and adjacent southwesternmost Nordkapp basin show multiple links and interactions. We focus the discussion on the interaction of these faults and associated minor faults on Late-Devonian-Carboniferous (half-) graben basins. We specifically discuss how deep-seated ductile Caledonian shear zones, i.e. the Sørøya-Ingøya shear zone and basement ridges may have been exhumed and thus enabled to control post-Caledonian brittle faulting and formation of Late-Devonian-Carboniferous basins as collapse basins. In combination, the structural architecture, timing of faulting and fault-controlled thickness variations on the Finnmark Platform and in the southwesternmost Nordkapp basin provide the framework to discuss the evolution of the SW Barents Sea margin from the Mid/Late Devonian to the Permian.

### 5.1. Interaction of the main segment of the Måsøy Fault Complex with the Sørøya-Ingøya shear zone

The linear, NE-SW trending geometry of the main segment of the MFC in map-view (Figure 1 & Figure 2) strongly differs from the dominant ENE-WSW to NNE-SSW trending, zig-zag pattern typically observed for post-Caledonian faults in Mid-Norway (Blystad et al., 1995), Lofoten-Vesterålen (Bergh et al., 2007; Eig, 2008; Hansen et al., 2012), Western Troms (Indrevær et al., 2013) and NW Finnmark (Koehl et al., submitted). Notably, the anomalously linear fault segment of the MFC trends fully parallel to and soles into high-amplitude, NW-dipping seismic reflections of the SISZ on the Finnmark Platform and in the southwesternmost Nordkapp basin (Figure 5 & Figure 4c-f). This obvious merging of main segment of the MFC into the basement-seated SISZ (Figure 5 & Figure 4c-f) suggests it formed as a brittle splay fault along an inverted portion of the SISZ, likely during the collapse of the Caledonides in the Mid/Late Devonian (Gudlaugsson et al., 1998). We suggest a similar interpretation for the Rolvsøya fault, which also flattens and merges into a bowed portion of the SISZ (Figure 5 & Figure 4c & d), and for the northwest-boundary fault of the Devonian graben on the Finnmark Platform west soling into a minor, SE-dipping shear zone (Figure 5 & Figure 4e & Figure 6 & Figure 5b & c). These faults are thought to have remained active through the late Carboniferous as suggested by potential syn-tectonic sediment thickening within

Formatted: Font: Not Bold

Formatted: Font: Not Bold, Not Italic, Check spelling and grammar

Formatted: Font: Not Bold

Formatted: Font: Not Bold, Not Italic, Check spelling and grammar

Formatted: Font: Not Bold

Formatted: Font: Not Bold, Not Italic, Check spelling and grammar

Formatted: Font: Not Bold

Formatted: Font: Not Bold, Not Italic, Check spelling and grammar

Formatted: Font: Not Bold

Formatted: Font: Not Bold, Not Italic, Check spelling and grammar

Formatted: Font: Not Bold

Formatted: Font: Not Bold, Not Italic, Check spelling and grammar

Formatted: Font: Not Bold

Formatted: Font: Not Bold, Not Italic, Check spelling and grammar

Formatted: Font: Not Bold

Formatted: Font: Not Bold, Not Italic, Check spelling and grammar

Formatted: Font: Not Bold

Formatted: Font: Not Bold, Not Italic, Check spelling and grammar

Formatted: Font: Not Bold

Formatted: Font: Not Bold, Not Italic, Check spelling and grammar

Formatted: Font: Not Bold

Formatted: Font: Not Bold, Not Italic, Check spelling and grammar

Formatted: Font: Not Bold

Formatted: Font: Not Bold, Not Italic, Check spelling and grammar

Formatted: Font: Not Bold

Formatted: Font: Not Bold, Not Italic, Check spelling and grammar

Formatted: Font: Not Bold

Formatted

the upper Carboniferous succession (Figure 9Figure 9Figure 8b) but most likely ceased before the Permian as supported by the relatively constant thickness of Permian sedimentary strata throughout the study area (Figure 9Figure 9Figure 8c).

By analogy, in the ~~central~~ North Sea, Phillips et al. (2016) successfully tied the southernmost onshore occurrence of the Karmøy Shear Zone, a major Caledonian shear zone, to a thick seismic unit made up with sub-parallel, high-amplitude reflections similar to those ascribed to the SISZ in the footwall of the main segment of the MFC (Figure 5Figure 5Figure 4d-f). Phillips et al. (2016) argue that the Åsta Fault, a large N-S trending, W-dipping, post-Caledonian fault in the North Sea, formed during a phase of extensional reactivation of the Karmøy Shear Zone. Similarly, in western Norway, Wilks & Cuthbert (1994) proposed that the Hornelen Basin formed along a brittle fault that splayed upwards from the Nordfjord-Sogn Detachment Zone during Middle Devonian late-orogenic extension.

## 5.2. Formation of the WNW-ESE trending fault segment of the Troms-Finmark Fault Complex as a hard-linked accommodation cross-fault

Our data (Figure 9Figure 9Figure 8a & b) show abrupt fault-controlled thickening of the Devonian-lower Carboniferous and upper Carboniferous sedimentary successions just northeast of the WNW-ESE trending segment of the TFFC into the southwesternmost Nordkapp basin. On the Finnmark Platform west, potential Devonian sedimentary rocks are truncated upwards by the mid-Carboniferous reflection, ~~which we interpret as a major angular unconformity (Figure 5Figure 5Figure 4e & f). This unconformity may have been caused by a major eustatic sea-level fall in mid-Carboniferous (Serpukhovian) times that exposed large areas to coastal erosion (Saunders & Ramsbottom, 1986).~~ We propose, ~~for example,~~ that the absence of high-amplitude, coal-bearing sedimentary deposits of the Billefjorden Group (lower Carboniferous) on the Finnmark Platform west is related to ~~this a~~ major episode of eustatic sea-level fall in the Serpukhovian (Saunders & Ramsbottom, 1986), which may have contributed to expose lower Carboniferous sedimentary rocks in this area to coastal erosion. Hence, part of the thickening of the Devonian-lower Carboniferous succession across the WNW-ESE trending segment of the TFFC might be related to extensive erosion of the Finnmark Platform west in mid-Carboniferous times. In addition, the clear deepening (plunge) to the northeast of the spoon-shaped trough formed by the three-

Formatted: Font: Not Bold

Formatted: Font: Not Bold, Not Italic, Check spelling and grammar

Formatted: Font: Not Bold

Formatted: Font: Not Bold, Not Italic, Check spelling and grammar

Formatted: Font: Not Bold

Formatted: Font: Not Bold, Not Italic, Check spelling and grammar

Formatted: Font: Not Bold

Formatted: Font: Not Bold, Not Italic, Check spelling and grammar

Formatted: Font: Not Bold

Formatted: Font: Not Bold, Not Italic, Check spelling and grammar

Formatted: Font: Not Bold

Formatted: Font: Not Bold, Not Italic, Check spelling and grammar

Formatted: Font: Not Bold

Formatted: Font: Not Bold, Not Italic, Check spelling and grammar

Formatted: Font: Not Bold

Formatted: Font: Not Bold, Not Italic, Check spelling and grammar

Formatted: Font: Not Bold

Formatted: Font: Not Bold, Not Italic, Check spelling and grammar

Formatted: Font: Not Bold

Formatted: Font: Not Bold, Not Italic, Check spelling and grammar

960 dimensionally folded and bowed geometry of the SISZ ([Figure 7](#)~~Figure 7~~[Figure 6](#)) suggests that  
the thickening of Devonian-lower Carboniferous sedimentary strata into the southwesternmost  
Nordkapp basin ([Figure 9](#)~~Figure 9~~[Figure 8a](#)) is also partly controlled by the shape and attitudes of  
the underlying SISZ. Finally, the thickened sediment depocenter observed in the southwesternmost  
Nordkapp basin at the intersection of the TFFC and the MFC ([Figure 9](#)~~Figure 9~~[Figure 8a & b](#)) is  
965 at least partly related to syn-sedimentary normal faulting along the WNW-ESE trending fault  
segment of the TFFC and along the main segment of the MFC. This most likely indicates that the  
TFFC and the MFC had already merged and acted as a single fault zone during sediment deposition  
in the southwesternmost Nordkapp basin from the end of the Serpukhovian and potentially from  
Devonian times. We propose that the WNW-ESE trending fault segment of the TFFC acted as an  
970 accommodation cross-fault, as defined in Sengör (1987), that transferred displacement between the  
NNE-SSW trending segment of the TFFC and the main segment of the MFC, defining a step  
synthetic with the deepening direction of the spoon-shaped trough formed by the geometry of the  
SISZ ([Figure 7](#)~~Figure 7~~[Figure 6](#)). This interpretation is based on the dominant dip-slip kinematic  
of the WNW-ESE trending segment of the TFFC and on its sub-parallel strike to the dominant  
975 WNW-ESE trending extension direction inferred along the SW Barents Sea margin during late  
Paleozoic times (Bergh et al., 2007; Eig & Bergh, 2011; Hansen & Bergh, 2012). Further, we infer  
that the strike and location of the WNW-ESE trending segment of the TFFC was controlled by the  
geometry of the underlying SISZ (see below), which dips gently to the northeast on the Finnmark  
Platform west and in the southwesternmost Nordkapp basin and may therefore have favored the  
980 formation of a NE-dipping fault at this location ([Figure 5](#)~~Figure 5~~[Figure 4g](#) & [Figure 7](#)~~Figure 7~~[Figure 6](#)).

Alternatively, Lea (2016) proposed that the WNW-ESE trending fault segment of the TFFC  
corresponds to a breached relay-ramp fault between the NNE-SSW trending fault segment of the  
TFFC and the MFC. However, this model implies that this portion of the TFFC would have  
985 accommodated significantly fewer displacement than the two faults it links (i.e. the NNE-SSW  
trending segment of the TFFC and the MFC), which is clearly not the case. The offset of the mid-  
Carboniferous reflection and the thickness increase both of the Middle/Upper Devonian-lower  
Carboniferous and upper Carboniferous sedimentary successions across the WNW-ESE trending  
segment of the TFFC are comparable to the offset and thickness increase observed across the main

Formatted: Font: Not Bold

Formatted: Font: Not Bold, Not Italic, Check spelling and grammar

Formatted: Font: Not Bold

Formatted: Font: Not Bold, Not Italic, Check spelling and grammar

Formatted: Font: Not Bold

Formatted: Font: Not Bold, Not Italic, Check spelling and grammar

Formatted: Font: Not Bold

Formatted: Font: Not Bold, Not Italic, Check spelling and grammar

Formatted: Font: Not Bold

Formatted: Font: Not Bold, Not Italic, Check spelling and grammar

Formatted: Font: Not Bold

Formatted: Font: Not Bold, Not Italic, Check spelling and grammar

Formatted: Font: Not Bold

Formatted: Font: Not Bold, Not Italic, Check spelling and grammar

Formatted: Font: Not Bold

Formatted: Font: Not Bold, Not Italic, Check spelling and grammar

Formatted: Font: Not Bold

Formatted: Font: Not Bold, Not Italic, Check spelling and grammar

Formatted: Font: Not Bold

Formatted: Font: Not Bold, Not Italic, Check spelling and grammar

Formatted: Font: Not Bold

Formatted: Font: Not Bold, Not Italic, Check spelling and grammar

Formatted: Font: Not Bold

Formatted: Font: Not Bold, Not Italic, Check spelling and grammar









1085 the NE-SW trending Lofoten Ridge in Lofoten-Vesterålen (Bergh et al., 2007; [Figure 1](#)), among which at least the Lofoten Ridge was exhumed as a metamorphic core complex (Klein & Steltenpohl, 1999; Klein et al., 1999; Steltenpohl et al., 2004; 2011) along inverted Caledonian shear zones such as the Eidsfjord and Fiskefjord shear zones (Steltenpohl et al., 2011). By comparison, the SISZ seems to coincide with high-positive aeromagnetic anomalies on the Finnmark Platform west that follow the trace of the MFC (Indrevær et al., 2013) and continue past the southwestern fault-tip of the MFC (Gernigon & Brönnner, 2012). The aeromagnetic anomalies visible on the dataset Gernigon & Brönnner (2012) appear to line up with aeromagnetic anomalies onshore the island of Vannøya, in the northeasternmost part of the West Troms Basement Complex ([Figure 1](#)), and these onshore anomalies correlate with NE-SW trending, SE-dipping basement shear zones that were reactivated as extensional brittle faults (Paulsen et al. pers. comm.; [Figure 4](#)).

1095 These data indicate that SE-dipping portions of the SISZ propagated southwest of the MFC fault-tip on the Finnmark Platform west and possibly merged onshore Vannøya in Western Troms with a suite of NE-SW trending, SE-dipping shear zones. As a consequence, the basement ridges observed on the Finnmark Platform west and along the northern flank of the southwesternmost Nordkapp basin may have formed as part of a large metamorphic core complex, which included the Lofoten Ridge, the West Troms Basement Complex and possibly also the Norsel High ([Figure 1](#), [Figure 4](#)), exhumed along inverted Caledonian shear zones, e.g. such as the SISZ on the SW Barents shelf and the analogous Eidsfjord and Fiskefjord shear zones in Lofoten-Vesterålen (Steltenpohl et al., 2011).

1105 The timing, nature of uplift and processes of core complex exhumation can be inferred from thickness variations of the SISZ in cross-section, for example, thickest in the footwall of the MFC and TFFC and thinnest below these two fault complexes ([Figure 5](#), [Figure 4f](#)). We link these thickness variations to excisement and incisement processes (cf. Lister & Davis, 1989) along the SISZ during core complex exhumation, after the embrittlement of the SISZ ([Figure 10](#), [Figure 9](#)). A model of Devonian late/post-orogenic extension is proposed, when ~~inversion of the SISZ was inverted~~ as a low-angle, ~~top-to-the-NW~~ extensional detachment ~~and extensive erosion of the Caledonides that~~ contributed to crustal thinning ~~through top to the NW tectonic transport~~ ([Figure 10](#), [Figure 9a](#)). ~~Relatively rapid thinning through extension and erosion~~ above the upper part of the SISZ may have triggered early exhumation of basement rocks on the Finnmark

Formatted: Font: Not Bold

Formatted: Font: Not Bold, Not Italic, Check spelling and grammar

Formatted: Font: Not Bold

Formatted: Font: Not Bold, Not Italic, Check spelling and grammar

Formatted: Font: Not Bold

Formatted: Font: Not Bold, Not Italic, Check spelling and grammar

Formatted: Font: Not Bold

Formatted: Font: Not Bold, Not Italic, Check spelling and grammar

Formatted: Font: Not Bold

Formatted: Font: Not Bold, Not Italic, Check spelling and grammar

Formatted: Font: Not Bold

Formatted: Font: Not Bold, Not Italic, Check spelling and grammar

Formatted: Font: Not Bold

Formatted: Font: Not Bold, Not Italic, Check spelling and grammar

Formatted: Font: Not Bold

Formatted: Font: Not Bold, Not Italic, Check spelling and grammar

Platform west and along the northern flank of the southwesternmost Nordkapp basin (Figure 10Figure 10Figure 9a), causing the upper part of the SISZ to bow upwards (Figure 10Figure 10Figure 9b). Continued crustal extension and continental erosion further enhanced exhumation of basement rocks below the upper part of the SISZ, leading the bowed portion of the SISZ to become unsuitably oriented to accommodate top-to-the-NW extensional displacement and therefore thus become inactive (dashed black line in Figure 10Figure 10Figure 9c). Further extension likely led triggered the SISZ to splay upwards splaying of the SISZ into its hanging-wall, becoming suitable again to accommodate top-to-the-NW extension displacement (Figure 10Figure 10Figure 9c). This upward splay-faulting process is referred to as excisement by Lister & Davis (1989) and we tentatively apply this process to explain the observed thickening of the SISZ in the footwall of the MFC (Figure 5Figure 5Figure 4f). Further extension/erosion-related crustal thinning along the SISZ may have initiated triggered the exhumation of basement rocks along progressively deeper parts of the SISZ (Figure 10Figure 10Figure 9b & c), causing bend-up of the SISZ at even deeper crustal levels (Figure 10Figure 10Figure 9d). Extreme bowing of lower portions of the SISZ led to opposite top-to-the-SE transport direction on the Finnmark Platform west and in the southwesternmost Nordkapp basin (Figure 10Figure 10Figure 9d), which contributed to exhume NE-SW to ENE-WSW trending ridges of basement rocks in the footwall of the NNE-SSW trending segment of the TFFC (Figure 5Figure 5Figure 4e & f) and in the footwall of the Rolvsøya fault (Figure 5Figure 5Figure 4c & d), thus forming a large spoon-shaped trough where Devonian sedimentary rocks deposited (Figure 7 and Figure 10d & e). Incisement (downward splaying; cf. Lister & Davis, 1989) may have occurred below the basement ridges during continued top-to-the-NW extension along the SISZ (Figure 10Figure 10Figure 9e) and possibly contributed to thicken the SISZ in the footwall of the TFFC (Figure 5Figure 5Figure 4e & f) and of the Rolvsøya fault (Figure 5Figure 5Figure 4c & d), resulting in the current geometry of the SISZ (Figure 10Figure 10Figure 9f). We believe that extreme bowing of lower portions of the SISZ and associated local top to the SE displacement contributed to form the spoon-shaped trough in which Devonian sedimentary rocks are thought to be deposited on the Finnmark Platform west and in the southwesternmost Nordkapp basin (Figure 6 & Figure 9d & e).

By comparison, in northeast Greenland, Sartini-Rideout et al. (2006) and Hallett et al. (2014) proposed that ultra-high pressure (UHP) basement rocks were exhumed along large, mylonitic, Caledonian shear zones in Late Devonian-early Carboniferous times (ca. 370-340 Ma).

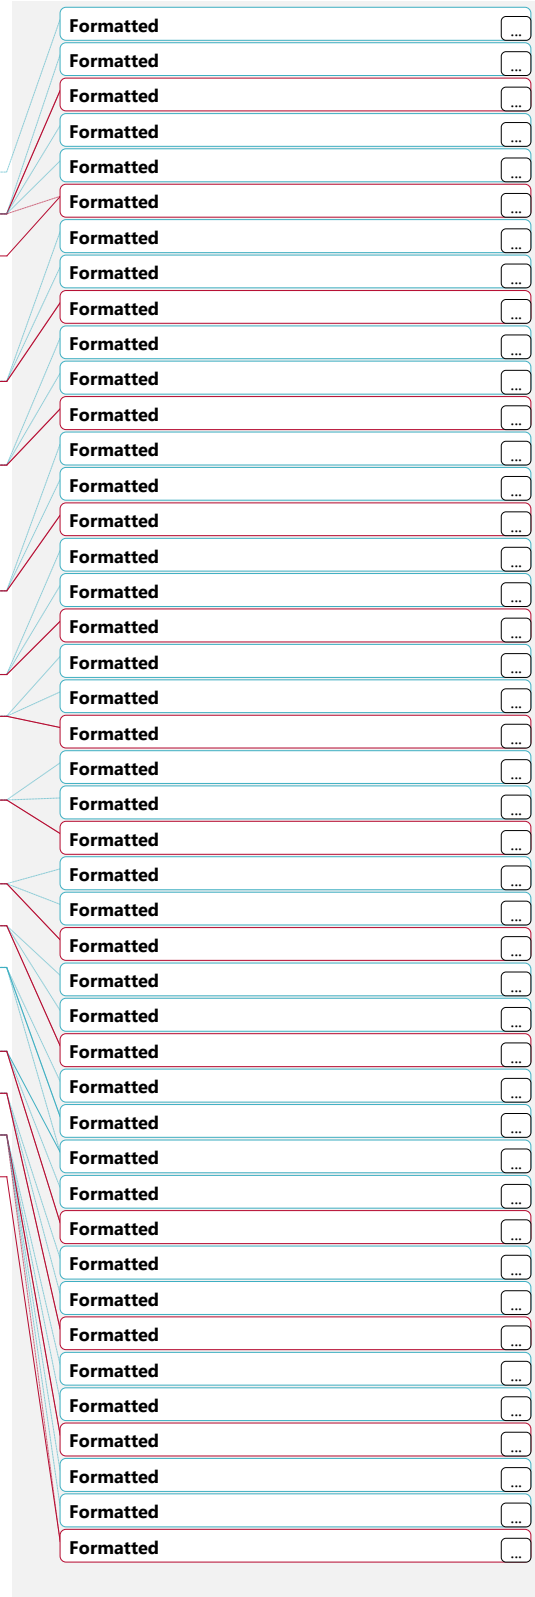



In Lofoten-Vesterålen, Steltenpohl et al. (2004) inferred a Late Devonian age for the exhumation of metamorphic core complexes and this age was refined by recent  $^{40}\text{Ar}/^{39}\text{Ar}$  isotopic results (Steltenpohl et al., 2011), which constrained extensional reactivation of the Eidsfjord shear zone to the Early Devonian. In the SW Barents Sea, much work is needed to better constrain the timing of late/post-Caledonian extension and collapse basin formation. Nonetheless, we believe that the Early Devonian age obtained in Lofoten-Vesterålen (Steltenpohl et al., 2011) represents a reasonable estimate for the onset of crustal thinning in the SW Barents Sea (Figure 10, Figure 10, Figure 9a-c). Additionally, Late Devonian-early Carboniferous timing of exhumation for basement rocks in northeast Greenland and formation of a regional mid-Carboniferous (Serpukhovian) unconformity (Sartini-Rideout et al., 2006; Hallett et al., 2014; McClelland et al., 2016) corresponds to a realistic approximation for the final stages of late/post Caledonian extension, ending with the formation of Devonian-Carboniferous collapse basins along exhumed, NE-SW to ENE-WSW trending basement ridges (Figure 10, Figure 10, Figure 9d-f).

### 5.5. Interaction of the Trollfjorden-Komagelva Fault Zone with the Troms-Finnmark and Måsøy fault complexes

The prolongation of the TKFZ from onshore areas in eastern Finnmark to offshore areas of the SW Barents Sea has been a matter of debate. Most studies tend to connect the onshore TKFZ with the offshore WNW-ESE trending fault segment of the TFFC (Gabrielsen, 1984; Gabrielsen & Færseth, 1989; Roberts et al., 2011; Bergø, 2016; Lea, 2016). Our data, however, suggest that the TKFZ dies out near the coasts of NW Finnmark (present contribution and Koehl et al., submitted), and in this section we review and discuss new evidence obtained from the interpretation of offshore seismic and aeromagnetic data.

First, the TKFZ was described onshore eastern Finnmark as a major sub-vertical fault that accommodated dominantly strike-slip movement (Roberts, 1972; Rice, 2013). Farther west, the TKFZ crops out onshore Magerøya, where it is made of numerous, high-frequency, subparallel, subvertical, WNW-ESE trending faults and fractures that accommodated at least small-scale post-Caledonian, strike-slip to oblique-slip displacement (Koehl et al., submitted). By contrast, seismic interpretation of the WNW-ESE trending fault segment of the TFFC shows that this fault exhibits a typical, high-angle (ca.  $70^\circ$ ) normal fault geometry and accommodated significant amount of

Formatted: Font: Not Bold

Formatted: Font: Not Bold, Not Italic, Check spelling and grammar

Formatted: Font: Not Bold

Formatted: Font: Not Bold, Not Italic, Check spelling and grammar

Formatted: Font: Not Bold

Formatted: Font: Not Bold, Not Italic, Check spelling and grammar

Formatted: Font: Not Bold

Formatted: Font: Not Bold, Not Italic, Check spelling and grammar





1240 southwesternmost Nordkapp basin (Figure 1; Koehl et al. submitted). Nearby Magerøya and the Nordkinn Peninsula, high-resolution aeromagnetic data reveal the presence of highly magnetic dolerite dykes along WNW-ESE trending fault segments of the TKFZ (Roberts et al., 1991; Nasuti et al., 2015; Koehl et al., submitted). These narrow, high-positive aeromagnetic anomalies also die out westwards (Gernigon & Brönnner, 2012; Gernigon et al., 2014), therefore supporting that the dolerite dykes and, thus, the TKFZ ~~may~~ die out before reaching the Finnmark Platform (Koehl et al., submitted).

1245 -We ~~explore consider~~ an alternative model to the fault-tip process zone of Koehl et al. (submitted); ~~in which~~ ~~We~~ we argue that, ~~during the Caledonian Orogeny~~, the Precambrian, ~~orogen-parallel~~, WNW-ESE trending TKFZ was ~~oriented subparallel to the dominant top to the SE transport direction of Caledonian thrusts in northern Norway (Townsend, 1987a) and thus~~ not suitably oriented to be reactivated as a major thrust or strike-slip fault ~~during the Caledonian Orogeny~~. ~~Instead,~~ ~~o~~Our data indicate that if the TKFZ extended farther west ~~onto the Finnmark Platform west~~ prior to the onset of Caledonian deformation, ~~it was certainly and was~~ truncated and decapitated by large-scale, top-to-the-SE movement along the SISZ and associated NE-SW trending, Caledonian thrusts and shear zones ~~during top to the SE thrusting~~. ~~This is supported by dominant top-to-the-SE transport direction inferred along Caledonian thrusts onshore NW Finnmark (Townsend, 1987a). Thus, we propose that~~ the western continuation of the TKFZ ~~on~~ ~~below~~ the Finnmark Platform may have been ~~transported~~ thrust southeastwards along the SISZ and is now ~~most likely~~ eroded. However, ~~if the TKFZ ever extended westwards~~, portions of ~~the its~~ western prolongation ~~of the TKFZ might have been~~ preserved ~~offshore~~ in offshore basement highs such as the Loppa and Veslemøy highs (Figure 1; ~~Figure 1~~), ~~assuming that the TKFZ extended west of Magerøya into the SW Barents Sea prior to the Caledonian Orogeny. More work is needed on this hypothesis, but a possible insight is~~ ~~This is supported by~~ the recent observation of subvertical, WNW-ESE trending brittle faults analog to the TKFZ ~~on~~ ~~in~~ basement rocks of the Veslemøy High (Kairanov et al., 2016).

Formatted: Font: Not Bold

Formatted: Font: Not Bold, Not Italic, Check spelling and grammar

Formatted: Font: Not Bold

Formatted: Font: Not Bold, Not Italic, Check spelling and grammar

Formatted: Font: Not Bold

Formatted: Font: Not Bold, Not Italic, Check spelling and grammar

## 1265 5.6. Late Paleozoic evolution of the SW Barents Sea margin

Based on the seismic data and discussions from previous chapters we now address the tectonic evolution of the Finnmark Platform and the southwesternmost Nordkapp basin in the late

1270 Paleozoic (Figure 11Figure 11Figure 10). The main structural element discussed in our model is the SISZ and we link its influence on (i) the development of the southwesternmost Nordkapp basin, (ii) the geometry of the TFFC and MFC, (iii) the deposition of Mid/Late Devonian sedimentary rocks in the southwesternmost Nordkapp basin and on the Finnmark Platform west, (iv) transfer faults such as the TKFZ and (v) the deposition of syn-tectonic sedimentary wedges along steep normal faults that bound triangular-shaped, Carboniferous basins in the Carboniferous.

1275 ~~We have demonstrated the presence of major, basement-seated, Caledonian shear zones on the Finnmark Platform west and below the southwesternmost Nordkapp basin. The largest of these shear zones is the SISZ, which strikes NE-SW and dips to the northwest (Figure 4e-g & Figure 5f). The trend and dominant northwestern dip of the SISZ (Figure 5c-g & Figure 6f) is shear zone~~  
1280 suggest that it formed as a large thrust that accommodated top-to-the-SE tectonic transport during the Caledonian Orogeny. The SISZ has a bow-shaped, three-dimensionally folded geometry that coincides with basement ridges in the footwall of the TFFC and of the Rolvsøya fault (Figure 5Figure 5Figure 4c-f, Figure 7Figure 7Figure 6 and Figure 11Figure 11Figure 10). We propose that the SISZ and potential other Caledonian shear zones along the SW Barents Sea margin were inverted as low-angle extensional shear zones during late/post-Caledonian orogenic extension and subsequent collapse. This is based on analog examples in northeast Greenland (Sartini-Rideout et al., 2006; Hallett et al., 2014; McClelland et al., 2016), western Norway (Séranne & Seguret, 1987; Séranne et al., 1989; Wilks & Cuthbert, 1994; Osmundsen & Andersen, 2001), mid-Norway (Braathen et al., 2000) and Lofoten-Vesterålen (Klein & Steltenpohl, 1999; Klein et al., 1999; Steltenpohl et al., 2004; 2011; Osmundsen et al., 2005). Extensional reactivation of such ductile shear zones along the Barents Sea margin ~~may~~ have initiated in the Early Devonian, as in Lofoten-Vesterålen (Steltenpohl et al., 2011), ~~through by crustal thinning and~~ orogenic collapse ~~through dominated by dominant~~ top-to-the-NW ~~displacement-movement~~ along the SISZ, ~~and later~~  
1285 ~~e~~

1290 ~~Exhumation of the SISZ and underlying basement ridges as a metamorphic core complex was probably triggered by extensional reactivation of the SISZ combined to continental erosion, leading to crustal thinning.~~ Reactivation of these exhumed basement ridges occurred by normal faulting along new, steep, brittle faults such as the main segment of the MFC and the NNE-SSW trending fault segment of the TFFC (cf. Figure 5Figure 5Figure 4f), likely due to incisement and excisement processes (Figure 10Figure 10Figure 9; Lister & Davis, 1989). These processes also  
1295

Formatted: Font: Not Bold

Formatted: Font: Not Bold, Not Italic, Check spelling and grammar

Formatted: Font: Not Bold

Formatted: Font: Not Bold, Not Italic, Check spelling and grammar

Formatted: Font: Not Bold

Formatted: Font: Not Bold, Not Italic, Check spelling and grammar

Formatted: Font: Not Bold

Formatted: Font: Not Bold, Not Italic, Check spelling and grammar

Formatted: Font: Not Bold

Formatted: Font: Not Bold, Not Italic, Check spelling and grammar

Formatted: Font: Not Bold

Formatted: Font: Not Bold, Not Italic, Check spelling and grammar

Formatted: Font: Not Bold

Formatted: Font: Not Bold, Not Italic, Check spelling and grammar

Formatted: Font: Not Bold

Formatted: Font: Not Bold, Not Italic, Check spelling and grammar

Formatted: Font: Not Bold

Formatted: Font: Not Bold, Not Italic, Check spelling and grammar

Formatted: Font: Not Bold

Formatted: Font: Not Bold, Not Italic, Check spelling and grammar

Formatted: Font: Not Bold

Formatted: Font: Not Bold, Not Italic, Check spelling and grammar

Formatted: Font: Not Bold

Formatted: Font: Not Bold, Not Italic, Check spelling and grammar

Formatted: Font: Not Bold

Formatted: Font: Not Bold, Not Italic, Check spelling and grammar

Formatted: Font: Not Bold

Formatted





collapse of the Caledonides essentially took place in the Mid/Late Devonian-Carboniferous and came to a halt towards the end of this ~~Period~~ ~~late Carboniferous~~ (Figure 11, Figure 11, Figure 10d).

This presumed timing is consistent with recent K/Ar radiometric dating of brittle fault gouges in Western Troms (Davids et al., 2013) and in NW Finnmark (Torgersen et al., 2014; Koehl et al., 2016), as well as with radiometric dating of dolerite dykes in NW Finnmark (Lippard & Prestvik, 1997), eastern Finnmark (Guise & Roberts, 2002) and on the Kola Peninsula in Russia (Roberts & Onstott, 1995), which constrain significant extensional faulting activity onshore northern Norway and adjacent areas in Russia to the Late Devonian-early/mid Permian. Minor reactivation of major fault complexes occurred in the Mesozoic-Cenozoic and are most likely associated with the rifting of the NE Atlantic (Faleide et al., 2008).

## 6. Conclusions

- 1) The atypically linear, NE-SW trending, main fault segment of the Måsøy Fault Complex formed as a brittle splay of the inverted Caledonian Sørøya-Ingøya shear zone through excisement processes during the collapse of the Caledonides in the Mid/Late Devonian-early Carboniferous and was active until the end of the late Carboniferous.
- 2) The WNW-ESE trending fault segment of the Troms-Finnmark Fault Complex developed as a hard-linked, accommodation cross-fault that accommodated orogen-parallel, late/post-orogen extension in the Mid/Late Devonian-Carboniferous. This fault merged with the main fault segment of the Måsøy Fault Complex and the two faults acted as a single fault at least during the late Carboniferous, but potentially from Devonian-early Carboniferous times, and accommodated the deposition of thick Devonian-lower Carboniferous and partly evaporitic upper Carboniferous deposits in the southwesternmost Nordkapp basin before faulting came to a halt towards the end of the late Carboniferous.
- 3) Low-gravity anomalies in the Gjesvær Low and southwesternmost Nordkapp basin may result from the presence of a thick, Mid/Late Devonian, spoon-shaped sedimentary basin that developed along an inverted, bowed portion of the Sørøya-Ingøya shear zone during the collapse of the Caledonides and that display a geometry similar to those of Middle Devonian, late/post-orogenic collapse basins in western and mid-Norway.

Formatted: Font: Not Bold

Formatted: Font: Not Bold, Not Italic, Check spelling and grammar

Formatted: Font: Not Bold

Formatted: Font: Not Bold, Not Italic, Check spelling and grammar

- 1395 4) The ENE-WSW and NE-SW trending basement ridges in the footwall of the Troms-  
Finnmark Fault Complex and on the northern flank of the southwesternmost Nordkapp  
basin formed through incisement processes and were exhumed along a bowed portion of  
the Sørøya-Ingøya shear zone during the collapse of the Caledonides in the Mid/Late  
Devonian-early Carboniferous. These basement ridges are thought to be part of a large-  
scale, margin-parallel, NE-SW trending, metamorphic core complex that includes a  
succession of aligned basement highs such as the Lofoten Ridge, the West Troms  
Basement Complex and the Norsel High. Core complex exhumation is believed to have  
1400 stopped by the end of the Serpukhovian when a major eustatic sea-level rise flooded the  
Finnmark Platform, leading to the deposition of widespread upper Carboniferous  
sediments.
- 1405 5) The Sørøya-Ingøya shear zone is thought to have truncated and decapitated Precambrian  
faults such as the Trollfjorden-Komagelva Fault Zone through top-to-the-SE thrusting  
during the Caledonian Orogeny and subsequent late/post-orogenic extension. We  
nevertheless believe that preserved segments of these Precambrian faults might be  
preserved offshore on basement highs such as the Loppa and Veslemøy highs. However,  
more work is required in order to map and evaluate the impact of these WNW-ESE  
trending, subvertical Precambrian faults on the SW Barents Sea margin.

1410

#### **Data availability**

The seismic data analyzed in this study are part of the DISKOS database and are publicly  
accessible from any Norwegian academic institution. Aeromagnetic data discussed in the present  
contribution are from Gernigon et al. (2014).

1415

#### **Author contribution**

Jean-Baptiste Koehl interpreted the seismic and aeromagnetic data and is the main  
contributor to the writing process (work-load ca. 45 %). Professor Steffen Bergh provided  
significant input to the “Introduction” and “Geological Setting” sections as well as detailed critical  
1420 reviews of the whole manuscript (work-load ca. 30 %). Tormod Henningsen helped initiating the  
project and provided help with seismic well-ties and regional seismic interpretation (work-load ca.

15 %). Professor Jan-Inge Faleide provided help with the writing process and helped improve the margin evolution model (work-load ca. 10 %).

## 1425 **Acknowledgements**

The present study is part of the ARCEX project (Research Centre for Arctic Petroleum Exploration), which is funded by the Research Council of Norway (grant number 228107) together with ten academic and eight industry partners. We would like to thank all the persons from these  
1430 institutions that are involved in this project. We acknowledge the NPD, the NTNU and Schlumberger for sharing seismic data from the DISKOS database, with special thanks to Dicky Harishidayat for taking care of the transfer of the data. We thank Tom Arne Rydningen from the University of Tromsø for reviewing parts of the manuscript. We would also like to thank Hanne-Kristin Paulsen from the University of Tromsø as well as Gwenn Péron-Pinvidic and Per-Terje  
1435 Osmundsen from the NGU for fruitful discussions.

## **References**

- Andersen, T. B.: The structure of the Magerøy Nappe, Finnmark, North Norway, *Nor. geol. unders.*, 363, 1-23, 1981.  
1440
- Andersen, T. B.: The stratigraphy of the Magerøy Supergroup, Finnmark, north Norway, *Nor. geol. unders.*, 395, 25-37, 1984.
- Andersen T. B., Austrheim, H., Sturt, B.A., Pedersen, S. and Kjærsud, K.: Rb-Sr whole rock ages from Magerøy, North Norwegian Caledonides, *Norsk Geologisk Tidsskrift*, 62, 79-85,  
1445 1982.
- Andresen, A., Agyei-Dwarko, N. Y., Kristoffersen, M. and Hanken, N-M.: A Timanian foreland basin setting for the late Neoproterozoic-Early Palaeozoic cover sequences (Dividal Group) of northeastern Baltica, in: *New Perspectives on the Caledonides of Scandinavia and Related Areas*, Corfu, F., Gasser, D. and Chew, D.M. (eds), Geological Society, London, Special Publications, 390, 157-175, 2014.  
1450
- Bergh, S. G. and Torske, T.: The Proterozoic Skoadduvarri Sandstone Formation, Alta, Northern Norway: A tectonic fan-delta complex, *Sedimentary Geology*, 47, 1-25, 1986.

- 1455 Bergh, S. G. and Torske, T.: Palaeovolcanology and tectonic setting of a Proterozoic metatholeiitic sequence near the Baltic Shield Margin, northern Norway, *Precambrian Research*, 39, 227-246, 1988.
- Bergh, S. G., Eig, K., Kløvjan, O. S., Henningsen, T., Olesen, O. and Hansen, J-A.: The Lofoten-Vesterålen continental margin: a multiphase Mesozoic-Palaeogene rifted shelf as shown by offshore-onshore brittle fault-fracture analysis, *Norwegian Journal of Geology*, 87, 29-58, 2007.
- 1460 Bergø, E.: Analyses of Paleozoic and Mesozoic brittle fractures in West-Finnmark, Unpublished Master's Thesis, University of Tromsø, 128 pp., 2016.
- Blystad, P., Brekke, H., Færseth, R. B., Larsen, B. T., Skogseid, J. and Tørudbakken, B.: Structural elements of the Norwegian continental shelf, Part II: The Norwegian Sea Region. *Norwegian Petroleum Directorate Bulletin*, 8, 45 pp., 1995.
- 1465 Braathen, A., Osmundsen, P-T., Nordgulen, Ø., Roberts D. and Meyer, G. B.: Orogen-parallel extension of the Caledonides in northern Central Norway: an overview, *Norwegian Journal of Geology*, 82, 225-241, 2000.
- Braathen, A., Osmundsen, P-T., Hauso, H., Semshaug, S., Fredman, N. and Buckley, S. J.: Fault-induced deformation in poorly consolidated, siliciclastic growth basin: A study from the Devonian in Norway, *Tectonophysics*, 586, 112-129, 2013.
- 1470 Breivik, A. J., Gudlaugsson, S. T. and Faleide, J-I.: Ottar Basin, SW Barents Sea: a major Upper Palaeozoic rift basin containing large volumes of deeply buried salt, *Basin Research*, 7, 299-312, 1995.
- Bugge, T., Mangerud, G., Elvebakk, G., Mørk, A., Nilsson, I., Fanavoll, S. and Vigran, J. O.: The Upper Palaeozoic succession on the Finnmark Platform, Barents Sea, *Norsk Geologisk Tidsskrift*, 75, 3-30, 1995.
- 1475 Bylund, G.: Palaeomagnetism of the Late Precambrian Vadsø and Barents Sea Groups, Varanger Peninsula, Norway, *Precambrian Research*, 69, 81-93, 1994.
- Chauvet, A. and Séranne, M.: Extension-parallel folding in the Scandinavian Caledonides: implications for late-orogenic processes, *Tectonophysics*, 238, 31-54, 1994.
- 1480 Cianfarra, P. and Salvini, F.: Lineament Domain of Regional Strike-Slip Corridor: Insight from the Neogene Transtentional De Geer Transform Fault in NW Spitsbergen, *Pure Appl. Geophys.*, 172, 1185-1201, 2015.



- 1485 Corfu, F., Armitage, P. E. B., Kullerud, K. and Bergh, S.G.: Preliminary U-Pb geochronology in the West Troms Basement Complex, North Norway: Archaean and Palaeoproterozoic events and younger overprints, *Nor. geol. unders. bull.*, 441, 61-72, 2003.
- Corfu, F., Torsvik, T. H., Andersen, T. B., Ashwal, L. D., Ramsay, D. M. and Roberts, R. J.: Early Silurian mafic-ultramafic and granitic plutonism in contemporaneous flysch, Magerøy, northern Norway: U-Pb ages and regional significance, *Journal of the Geological Society*, London, 163, 291-301, 2006.
- 1490 Corfu, F., Andersen, T. B. and Gasser, D.: The Scandinavian Caledonides: main features, conceptual advances and critical questions, in: *New Perspectives on the Caledonides of Scandinavia and Related Areas*, Corfu, F., Gasser, D. and Chew, D. M. (eds), Geological Society, London, Special Publications, 390, 9-43, 2014.
- 1495 Crider, J. G.: Oblique slip and the geometry of normal-fault linkage: mechanics and a case study from the Basin and Range in Oregon, *Journal of Structural Geology*, 23, 1997-2009, 2001.
- Cutbill, J. L. and Challinor, A.: Revision of the Stratigraphical Scheme for the Carboniferous and Permian of Spitsbergen and Bjørnøya, *Geol. Mag.*, 102, 418-439, 1965.
- Cutbill, J. L., Henderson, W. G. and Wright, N. J. R.: The Billefjorden Group (Early Carboniferous) of central Spitsbergen, *Norsk Polarinstitutt Skrifter*, 164, 57-89, 1976.
- 1500 Davids C., Wemmer, K., Zwingmann, H., Kohlmann, F., Jacobs, J. and Bergh, S. G.: K-Ar illite and apatite fission track constraints on brittle faulting and the evolution of the northern Norwegian passive margin, *Tectonophysics*, 608, 196-211, 2013.
- Doré, A. G., Lundin, E. R., Fichler, C. and Olesen, O.: Patterns of basement structure and reactivation along the NE Atlantic margin, *Journal of the Geological Society*, London, 154, 85-92, 1997.
- 1505 Eig, K.: Onshore and offshore tectonic evolution of the Lofoten passive margin, North Norway, PhD thesis, University of Tromsø, 256 pp, 2008.
- Eig, K. and Bergh, S. G.: Late Cretaceous-Cenozoic fracturing in Lofoten, North Norway: Tectonic significance, fracture mechanisms and controlling factors, *Tectonophysics*, 499, 190-215, 2011.
- 1510 Elvevold, S., Reginiussen, H., Krogh, E. J. and Bjørklund, F.: Reworking of deep-seated gabbros and associated contact metamorphosed paragneisses in the south-eastern part of the Seiland Igneous Province, northern Norway, *Journal of Metamorphic Geology*, 12, 539-556, 1994.

- 1515 Faleide, J-I., Gudlaugsson, S. T. and Jacquart, G.: Evolution of the western Barents Sea, *Marine and Petroleum Geology*, 1, 123-150, 1984.
- Faleide, J-I., Vågnes, E. and Gudlaugsson, S. T.: Late Mesozoic-Cenozoic evolution of the southwestern Barents Sea in a regional rift-shear tectonic setting, *Marine and Petroleum Geology*, 10, 186-214, 1993.
- 1520 Faleide, J-I., Tsikalas, F., Breivik, A. J., Mjelde, R., Ritzmann, O., Engen, Ø., Wilson, J. and Eldholm, O.: Structure and evolution of the continental margin off Norway and the Barents Sea, *Episodes*, 31, 82-91, 2008.
- Fazlikhani, H., Fossen, H., Gawthorpe, R. L., Faleide, J-I. and Bell, R. E.: Basement structure and its influence on the structural configuration of the northern North Sea rift, *Tectonics*, 36, 1-27, 2017.
- 1525 Fountain, D. M., Hurich, C. A. and Smithson, S. B.: Seismic reflectivity of mylonite zones in the crust, *Geology*, 12, 195-198, 1984.
- Gabrielsen, R. H.: Long-lived fault zones and their influence on the tectonic development of the southwestern Barents Sea, *Journal of the Geological Society, London*, 141, 651-662, 1984.
- 1530 Gabrielsen R. H. and Færseth, R. B.: The inner shelf of North Cape, Norway and its implications for the Barents Shelf-Finmark Caledonide boundary. A comment, *Norsk Geologisk Tidsskrift*, 69, 57-62, 1989.
- Gabrielsen R. H., Færseth, R. B., Jensen, L. N., Kalheim, J. E. and Riis, F.: Structural elements of the Norwegian continental shelf, Part I: The Barents Sea Region, *Norwegian Petroleum Directorate Bulletin*, 6, 33 pp., 1990.
- 1535 Gabrielsen R. H., Kløvjan, O. S., Rasmussen, A. and Stølan, T.: Interaction between halokinesis and faulting: structuring of the margins of the Nordkapp Basin, Barents Sea region, in: *Structural and Tectonic Modelling and its Application to Petroleum Geology*, Larsen, R. M., Brekke, H., Larsen, B. T. and Talleraas, E. (eds), NPF Special Publication, 1, 121-131, 1992.
- 1540 Gayer, R. A., Hayes, S. J. and Rice, A. H. N.: The structural development of the Kalak Nappe Complex of Eastern and Central Porsangerhalvøya, Finnmark, Norway, *Nor. geol. unders. bull.*, 400, 67-87, 1985.

- Gernigon L. & M. Brönnner. 2012. Late Palaeozoic architecture and evolution of the southwestern Barents Sea: insights from a new generation of aeromagnetic data. *Journal of the Geological Society*, London, vol. 127, pp. 1-11.
- Gernigon, L., Brönnner, M., Roberts, D., Olesen, O., Nasuti, A. and Yamasaki, T.: Crustal and basin evolution of the southwestern Barents Sea: From Caledonian orogeny to continental breakup, *Tectonics*, 33, 347-373, 2014.
- 1550 Gjelberg, J. G.: Upper Devonian (Famennian) – Middle Carboniferous succession of Bjørnøya, a study of ancient alluvial and coastal marine sedimentation, *Norsk Polarinstitutt Skrifter*, 174, 67 pp., 1981.
- Gjelberg, J. G.: Early-Middle Carboniferous sedimentation on Svalbard. A study of ancient alluvial and coastal marine sedimentation in rift- and strike-slip basins, PhD thesis, University of Bergen, 306 pp., 1984.
- 1555 Gjelberg, J. G. and Steel, R. J.: An outline of Lower-Middle Carboniferous sedimentation on Svalbard: Effects of tectonic, climatic and sea level changes in rift basin sequences. In: *Geology of the North Atlantic Borderlands*, Kerr, J. W. and Ferguson, A. J. (eds), *Can. Soc. Of Petrolm Geol. Mem.*, 7, 543-561, 1981.
- 1560 Gjelberg, J. G. and Steel, R. J.: Middle Carboniferous marine transgression, Bjørnøya, Svalbard: facies sequences from an interplay of sea level changes and tectonics, *Geological Journal*, 18, 1-19, 1983.
- Gudlaugsson, S. T., Faleide, J.-I., Johansen, S. E. and Breivik, A. J.: Late Palaeozoic structural development of the South-western Barents Sea, *Marine and Petroleum Geology*, 15, 73-102, 1998.
- 1565 Guise, P. G. and Roberts, D.: Devonian ages from  $^{40}\text{Ar}/^{39}\text{Ar}$  dating of plagioclase in dolerite dykes, eastern Varanger Peninsula, North Norway, *Nor. geol. unders.*, 440, 27-37, 2002.
- Hallett, B. W., McClelland, W. C. and Gilotti, J. A.: The Timing of Strike-Slip Deformation Along the Storstrømmen Shear Zone, Greenland Caledonides: U-Pb Zircon and Titanite Geochronology, *Geoscience Canada*, 41, 19-45, 2014.
- 1570 Hansen, J.-A. and Bergh, S. G.: Origin and reactivation of fracture systems adjacent to the Mid-Norwegian continental margin on Hamarøya, North Norway: use of digital geological mapping and morphotectonic lineament analysis, *Norwegian Journal of Geology*, 92, 391-403, 2012.

- 1575 Hansen, J-A., Bergh, S. G. and Henningsen, T.: Mesozoic rifting and basin evolution on the Lofoten and Vesterålen Margin, North-Norway; time constraints and regional implications, *Norwegian Journal of Geology*, 91, 203-228, 2012.
- Herrevold, T., Gabrielsen, R. H. and Roberts, D.: Structural geology of the southeastern part of the Trollfjorden-Komagelva Fault Zone, Varanger Peninsula, Finnmark, North Norway, 1580 *Norwegian Journal of Geology*, 89, 305-325, 2009.
- Indrevær, K. and Bergh, S. G.: Linking onshore-offshore basement rock architecture and brittle faults on the submerged strandflat along the SW Barents Sea margin, using high-resolution (5 x 5 m) bathymetry data, *Norwegian Journal of Geology*, 94, 1-34, 2014.
- Indrevær, K., Bergh, S. G., Koehl, J-B., Hansen, J-A., Schermer, E. R. and Ingebrigtsen, A.: Post-1585 Caledonian brittle fault zones on the hyperextended SW Barents Sea margin: New insights into onshore and offshore margin architecture, *Norwegian Journal of Geology*, 93, 167-188, 2013.
- Jensen, L. N. and Sørensen, K.: Tectonic framework and halokinesis of the Nordkapp Basin, Barents Sea, in: *Structural and Tectonic Modelling and its Application to Petroleum Geology*, Larsen, R. M., Brekke, H., Larsen, B. T. and Talleraas, E. (eds.), Norwegian Petroleum Society (NPF), Special Publications, 1, 109-120, 1992. 1590
- Johansen, S. E., Henningsen, T., Rundhovde, E., Sæther, B. M., Fichler, C. and Rueslåtten, H. G.: Continuation of the Caledonides north of Norway: seismic reflectors within the basement beneath the southern Barents Sea, *Marine and Petroleum Geology*, 11, 190-201, 1994.
- 1595 Kairanov, B., Escalona, A., Norton, I., Nadeau, P. and Lawver, L.: Early Cretaceous-Cenozoic relation between the Tromsø Basin and NE Greenland; Implications for margin evolution, in: *Onshore-Offshore Relationships on the North Atlantic margins*, Norsk Geologi Forening Abstracts and Proceedings, 1, 2016.
- Kirkland, C. L., Daly, J. S. and Whitehouse, M. J.: Early Silurian magmatism and the Scandian 1600 evolution of the Kalak Nappe Complex, Finnmark, Arctic Norway, *Journal of the Geological Society, London*, 162, 985-1003, 2005.
- Kirkland, C. L., Daly, J. S. and Whitehouse, M. J.: Provenance and Terrane Evolution of the Kalak Nappe Complex, Norwegian Caledonides: Implications for Neoproterozoic Paleogeography and Tectonics, *The Journal of Geology*, 115, 21-41, 2007.

- 1605 Kirkland, C. L., Daly, J. S. and Whitehouse, M. J.: Basement-cover relationships of the Kalak Nappe Complex, Arctic Norwegian Caledonides and constraints on Neoproterozoic terrane assembly in the North Atlantic region, *Precambrian Research*, 160, 245-276, 2008.
- Klein, A. C. and Steltenpohl, M. G.: Basement-cover relations and late- to post-Caledonian extension in the Leknes group, west-central Vestvågøy, Lofoten, north Norway, *Norsk Geologisk Tidsskrift*, 79, 19-31, 1999.
- 1610 Klein, A. C., Steltenpohl, M. G., Hames, W. E. and Andresen, A.: Ductile and brittle extension in the southern Lofoten archipelago, north Norway: implications for differences in tectonic style along an ancient collisional margin, *American Journal of Science*, 299, 69-89, 1999.
- Koehl, J-B., Wemmer, K. and Bergh, S. G.: Shallow faulting and westwards migration of rifting from mid-Permian times in North Norway, evidence from K/Ar radiometric dating, in: *Onshore-Offshore Relationships on the North Atlantic margins*, Norsk Geologi Forening Abstracts and Proceedings, 1, 2016.
- 1615 Koehl, J-B., Kvanli, T-E., Rowan, M. G. and Faleide, J-I.: Late Carboniferous salt tectonics in the southwesternmost Nordkapp basin, Poster presentation, ARCEX Annual Conference 2017, 10-11 May, Malangen, Norway, 2017.
- 1620 Koehl, J-B., Bergh, S. G., Osmundsen, P-T., Redfield, T. F., [Indrevær, K.](#), Lea, H. and Bergø, E.: [Late Devonian-Carboniferous faulting in NW Finnmark and controlling fabrics](#)~~Evolution and interaction of the Langfjord-Vargsund fault and Trollfjord-Komagelv Fault Zone during the collapse of the Caledonides~~, *Norwegian Journal of Geology*, submitted.
- 1625 Koyi, H., Talbot, C. J. and Tørudbakken, B. O.: Salt diapirs of the southwest Nordkapp Basin analogue modelling, *Tectonophysics*, 228, 167-187, 1993.
- Larssen, G. B., Elvebakk, G., Henriksen, S. E., Nilsson, I., Samuelsen, T. J., Svånå, T. A., Stemmerik, L. and Worsley D.: Upper Palaeozoic lithostratigraphy of the Southern Norwegian Barents Sea, *Norwegian Petroleum Directorate Bulletin*, 9, 76 pp., 2002.
- 1630 Lea, H.: Analysis of Late palaeozoic-Mesozoic brittle faults and fractures in West-Finnmark: geometry, kinematics, fault rocks and the relationship to offshore structures on the Finnmark Platform in the SW Barents Sea, Unpublished Master's Thesis, University of Tromsø, 129 pp., 2016.
- Lippard, S. J. and Prestvik, T.: Carboniferous dolerite dykes on Magerøy: new age determination and tectonic significance, *Norsk Geologisk Tidsskrift*, 77, 159-163, 1997.
- 1635

- Lippard, S. J. and Roberts, D.: Fault systems in Caledonian Finnmark and the southern Barents Sea, *Nor. geol. unders. bull.*, 410, 55-64, 1987.
- Lister, G. S. and Davis, G. A.: The origin of metamorphic core complexes and detachment faults formed during Tertiary continental extension in the northern Colorado River region, U.S.A., *Journal of Structural Geology*, 11, 65-94, 1989.
- 1640 Manby, G. and Lyberis, N.: Tectonic evolution of Devonian Basin of northern Svalbard, *Norsk Geologisk Tidsskrift*, 72, 7-19, 1992.
- Mattingsdal, R., Høy, T., Simonstad, E. and Brekke, H.: An updated map of structural elements in the southern Barents Sea, Norwegian Petroleum Directorate, 2015.
- 1645 Maxant, J.: Variation of density with rock type, depth, and formation in the Western Canada basin from density logs, *Geophysics*, 45, 1061-1076, 1980.
- McCann, A. J. and Dallmann, W. K.: Reactivation of the long-lived Billefjorden Fault Zone in north central Spitsbergen, Svalbard, *Geological Magazine*, 133, 63-84, 1996.
- McClelland, W. C., Gilotti, J. A., Ramarao, T., Stemmerik, L. and Dalhoff, F.: Carboniferous basin in Holm Land records local exhumation of the North-East Greenland Caledonides: Implications for the detrital zircon signature of a collisional orogeny, *Geosphere*, 12, 925-947, 2016.
- 1650 Nasuti, A., Roberts, D. and Gernigon, L.: Multiphase mafic dykes in the Caledonides of northern Finnmark revealed by a new high-resolution aeromagnetic dataset, *Norwegian Journal of Geology*, 95, 251-263, 2015.
- 1655 Nilsen, K. T., Vendeville, B. C. and Johansen, J-T.: Influence of Regional Tectonics on Halokinesis in the Nordkapp Basin, Barents Sea, in: *Salt tectonics a global perspective*, Jackson, M. P. A., Roberts, D. G. and Snelson, S. (eds), *AAPG Memoir*, 65, 413-436, 1995.
- Olesen, O., Roberts, D., Henkel, H., Lile, O. B. and Torsvik, T. H.: Aeromagnetic and gravimetric interpretation of regional structural features in the Caledonides of West Finnmark and North Troms, northern Norway, *Nor. geol. unders. bull.*, 419, 1-24, 1990.
- 1660 Olesen, O., Torsvik, T. H., Tveten, E. and Zwaan, K. B.: The Lofoten-Lopphavet Project – an integrated approach to the study of a passive continental margin, *Summary report*, 54 pp., 1993.
- 1665 Olesen, O., Torsvik, T. H., Tveten, E., Zwaan, K. B., Løseth, H. and Henningsen, T.: Basement structure of the continental margin in the Lofoten-Lopphavet area, northern Norway:

- constraints from potential field data, on-land structural mapping and palaeomagnetic data, *Norsk Geologisk Tidsskrift*, 77, 15-30, 1997.
- 1670 Olesen, O., Brønner, M., Ebbing, J., Gellein, J., Gernigon, L., Koziel, J., Lauritsen, T., Myklebust, R., Pascal, C., Sand, M., Solheim, D. and Usov, S.: New aeromagnetic and gravity compilations from Norway and adjacent areas: methods and applications, in: *From Mature Basins to New Frontiers*, Vining, B. A. and Pickering, S. C. (eds), *Petroleum Geology, Proceedings of the 7<sup>th</sup> Petroleum Geology Conference*, 559-586, 2010.
- 1675 Omosanya, K. O., Johansen, S. E. and Harishidayat, D.: Evolution and character of supra-salt faults in the Easternmost Hammerfest Basin, SW Barents Sea, *Marine and Petroleum Geology*, 66, 1013-1028, 2015.
- Osmundsen, P-T. and Andersen, T. B.: The middle Devonian basins of western Norway: sedimentary response to large-scale transtensional tectonics, *Tectonophysics*, 332, 51-68, 2001.
- 1680 Osmundsen, P.T., Braathen, A., Sommaruga, A., Skilbrei, J. R., Nordgulen, Ø., Roberts, D., Andersen, T. B., Olesen, O. and Mosar, J.: Metamorphic core complexes along the Mid-Norwegian margin: an overview and some current ideas. In: *Onshore-offshore relations on the Mid-Norwegian margin*, Wandaas, B., Gradstein, F. et al. (eds), *Norwegian Petroleum Society, Special Publications*, 12, 29-41, 2005.
- 1685 Ottesen, D., Stokes, C. R., Rise, L. and Olsen, L.: Ice-sheet dynamics and ice streaming along the coastal parts of northern Norway, *Quaternary Science Reviews*, 27, 922-940, 2008.
- 1690 Pastore, Z., Fichler, C. and McEnroe, S. A.: [The deep crustal structure of the mafic-ultramafic Seiland Igneous Province of Norway from 3-D gravity modelling and geological implications-Potential field modelling of the Seiland Igneous Province in the geodynamic framework of the northern Baltican margin, in: 7<sup>th</sup> International Conference on Arctic Margins—ICAM, \*Geophys. J. Int.\*, 207, 1653-1666, 2016.](#)
- Pharaoh, T. C., Macintyre, R. M. and Ramsay, D. M.: K-Ar age determinations on the Raipas suite in the Komagfjord Window, northern Norway, *Norsk Geologisk Tidsskrift*, 62, 51-57, 1982.
- 1695 Pharaoh, T. C., Ramsay, D. M. and Jansen, Ø.: Stratigraphy and Structure of the Northern Part of the Repparfjord-Komagfjord Window, Finnmark, Northern Norway, *Nor. geol. unders.*, 377, 1-45, 1983.

- Phillips, T., Jackson, C. A-L., Bell, R. E., Duffy, O. B. and Fossen, H.: Reactivation of intrabasement structures during rifting: A case study from offshore southern Norway, *Journal of Structural Geology*, 91, 54-73, 2016.
- 1700
- Rafaelsen, B., Elvebakk, G., Andreassen, K., Stemmerik, L., Colpaert, A. and Samuelsberg, T. J.: From detached to attached carbonate buildup complexes – 3D seismic data from the Upper Palaeozoic, Finnmark Platform, southwestern Barents Sea, *Sedimentary Geology*, 206, 17-32, 2008.
- 1705
- Ramberg, I. B., Bryhni, I., Nøttvedt, A. and Rangnes, K.: The making of a land. *Geology of Norway*, The Norwegian geological Association, Oslo, 2008.
- [Reeve, M. T., Bell, R. E. and Jackson, C. A. L.: Origin and significance of intra-basement seismic reflections offshore western Norway, \*Journal of the Geological Society, London\*, 171, 1-4, 2013.](#)
- 1710
- Rice, A. H. N.: Restoration of the External Caledonides, Finnmark, North Norway, in: *New Perspectives on the Caledonides of Scandinavia and Related Areas*, Corfu, F., Gasser, D. and Chew, D. M. (eds), Geological Society, London, Special Publications, 390, 271-299, 2013.
- Rise, L., Bellec, V. K., Chand, S. and Bøe R.: Pockmarks in the southwestern Barents Sea and Finnmark fjords, *Norwegian Journal of Geology*, 94, 263-282, 2015.
- 1715
- Roberts, D.: Patterns of folding and fracturing in north-east Sørøy, *Nor. geol. unders.*, 269, 89-95, 1971.
- Roberts, D.: Tectonic deformation in the Barents Sea region of Varanger Peninsula, Finnmark, *Nor. geol. unders.*, 282, 1-39, 1972.
- 1720
- [Roberts, D.: Palaeocurrent data from the Kalak Nappe Complex northern Norway: a key element in models of terrane affiliation, \*Norwegian Journal of Geology\*, 87, 319-328, 2007.](#)
- Roberts, D. and Lippard, S. J.: Inferred Mesozoic faulting in Finnmark: current status and offshore links, *Nor. geol. unders. bull.*, 443, 55-60, 2005.
- Roberts, D. and Onstott, T. C.:  $^{40}\text{Ar}/^{39}\text{Ar}$  laser microprobe analyses and geochemistry of dolerite dykes from the Rybachi and Sredni Peninsulas, NW Kola, Russia, *Nor. geol. unders. Special Publication*, 7, 307-314, 1995.
- 1725



- Roberts, D. and Siedlecka, A.: Timanian orogenic deformation along the northeastern margin of Baltica, Northwest Russia and Northeast Norway, and Avalonian-Cadomian connections, *Tectonophysics*, 352, 169-184, 2002.
- 1730 Roberts, D. and Siedlecka, A.: Provenance and sediment routing of Neoproterozoic formations on the Varanger, Nordkinn, Rybachi and Sredni peninsulas, North Norway and Northwest Russia: a review, *Nor. geol. unders. bull.*, 452, 1-19, 2012.
- Roberts, D. and Williams, G. D.: Berggrunnskart KJØLLEFJORD 2236-4 M 1:50 000, foreløpig utgave. *Nor. geol. unders.*, 2013.
- 1735 Roberts, D., Mitchell, J. G. and Andersen, T. B.: A post-Caledonian dyke from Magerøy North Norway: age and geochemistry, *Norwegian Journal of Geology*, 71, 289-294, 1991.
- Roberts, D., Olesen, O. and Karpuz, M. R.: Seismo- and neotectonics in Finnmark, Kola Peninsula and the southern Barents Sea. Part 1: Geological and neotectonic framework, *Tectonophysics*, 270, 1-13, 1997.
- 1740 Roberts, D., Chand, S. and Rise, L.: A half-graben of inferred Late Palaeozoic age in outer Varangerfjorden, Finnmark: evidence from seismic reflection profiles and multibeam bathymetry, *Norwegian Journal of Geology*, 91, 191-200, 2011.
- Røe, S-L. and Roberts, D.: Basement core sandstones in well 7128/6-1, southern Barents Sea, and correlation with onshore upper Proterozoic sequences of northeastern Finnmark, Unpublished report, University of Bergen, Geological Institute, Bergen, Norway, 33 pp., 1992.
- 1745 Rykkelid, E.: E69 "FATIMA" – Geologisk undersøkelse av tunnel under Magerøysundet, Veglaboratoriet, Statens Vegvesen, 1992.
- Samuelsberg, T. J., Elvebakk, G. and Stemmrik, L.: Late Paleozoic evolution of the Finnmark Platform, southern Norwegian Barents Sea, *Norwegian Journal of Geology*, 83, 351-362, 2003.
- Sartini-Rideout, C., Gilotti, J. A. and McClelland, W. C.: Geology and timing of dextral strike-slip shear zones in Danmarkshavn, North-East Greenland Caledonides, *Geological Magazine*, 143, 431-446, 2006.
- 1755 Saunders, W. B. and Ramsbottom, W. H. C.: The mid-Carboniferous eustatic event, *Geology*, 14, 208-212, 1986.

- 1760 Sengör, A. M. C.: Cross-faults and differential stretching of hanging walls in regions of low-angle normal faulting: examples from western Turkey, In: Continental Extensional Tectonics, Coward, M. P., Dewey, J. F. and Hancock P. L. (eds), Geological Society Special Publication, 28, 575-589, 1987.
- Séranne, M., Chauvet, A., Seguret, M. and Brunel, M.: Tectonics of the Devonian collapse-basins of western Norway, Bull. Soc. Géol. Fr., 8, 489-499, 1989.
- Shipton, Z. K. and Cowie, P. A.: A conceptual model for the origin of fault damage zone structures in high-porosity sandstones, Journal of Structural Geology, 25, 333-344, 2003.
- 1765 Siedlecka, A.: Late Precambrian Stratigraphy and Structure of the North-Eastern Margin of the Fennoscandian Shield (East Finnmark – Timan Region), Nor. geol. unders., 316, 313-348, 1975.
- [Siedlecka, A. and Roberts, D.: The bedrock geology of Varanger Peninsula, Finnmark, North Norway: an excursion guide. Nor. geol. unders. Special Publication, 5, 1-45, 1992.](#)
- 1770 Siedlecka, A. and Siedlecki, S.: Some new aspects of the geology of Varanger peninsula (Northern Norway), Nor. geol. unders., 247, 288-306, 1967.
- Siedlecka, A., Roberts, D., Nystuen, J. P. and Olovyanishnikov, V. G.: Northeastern and northwestern margins of Baltica in Neoproterozoic time: evidence from the Timanian and Caledonian Orogens, Geological Society, London, Memoirs, 30, 169-190, 2004.
- 1775 Siedlecki, S.: Geologisk kart over Norge, berggrunnskart Vadsø – M 1:250 000. Nor. geol. unders., 1980.
- Smelror, M., Petrov, O. V., Larssen, G. B. and Werner, S. C.: Geological history of the Barents Sea, Nor. geol. unders., Trondheim, 135 pp., 2009.
- 1780 Solheim, A. and Kristoffersen, Y.: The physical environment in the Western Barents Sea, 1: 5,000,000. Sediments above the upper regional unconformity: thickness, seismic stratigraphy and outline of the glacial history, Norsk Polarinstitutt Skrifter, 179B, 1-26, 1984.
- 1785 Steltenpohl, M. G., Hames, W. E. and Andresen, A.: The Silurian to Permian history of a metamorphic core complex in Lofoten, northern Scandinavian Caledonides, Tectonics, 23, 1-23, 2004.

- Steltenpohl, M. G., Moecher, D., Andresen, A., Ball, J., Mager, S. and Hames, W. E.: The Eidsfjord shear zone, Lofoten-Vesterålen, north Norway: An Early Devonian, paleoseismogenic low-angle normal fault, *Journal of Structural Geology*, 33, 1023-1043, 2011.
- 1790 Torgersen, E., Viola, G., Zwingmann, H. and Harris, C.: Structural and temporal evolution of a reactivated brittle-ductile fault – Part II: Timing of fault initiation and reactivation by K-Ar dating of synkinematic illite/muscovite, *Earth and Planetary Science Letters*, 407, 221-233, 2014.
- Torske, T. and Bergh, S. G.: The Caravari Formation of the Kautokaino Greenstone Belt, Finnmark, North Norway; a Palaeoproterozoic foreland basin succession, *Nor. geol. unders. bull.*, 442, 5-22, 2004.
- 1795 Townsend, C.: Thrust transport directions and thrust sheet restoration in the Caledonides of Finnmark, North Norway, *Journal of Structural Geology*, 9, 345-352, 1987a.
- Townsend, C.: The inner shelf of North Cape, Norway and its implications for the Baretns Shelf-Finnmark Caledonide boundary, *Norsk Geologisk Tidsskrift*, 67, 151-153, 1987b.
- 1800 Vorren, T., Kristoffersen, Y. and Andreassen, K.: Geology of the inner shelf west of North Cape, Norway, *Norsk Geologisk Tidsskrift*, 66, 99-105, 1986.
- Wilks, W. J. and Cuthbert, S. J.: The evolution of the Hornelen Basin detachment system western Norway: implications for the style of late orogenic extension in the southern Scandinavian Caledonides, *Tectonophysics*, 238, 1-30, 1994.
- 1805 Worsley, D.: The post-Caledonian development of Svalbard and the western Barents Sea, *Polar Research*, 27, 298-317, 2008.
- Worthing, M. A.: Fracture patterns on Eastern Seiland, North Norway and their possible Relationship to Regional Faulting, *Nor. geol. unders. bull.*, 398, 35-41, 1984.
- 1810 [Zhang, W. Roberts, D. and Pease, V.: Provenance of sandstones from Caledonian nappes in Finnmark, Norway: Implications for Neoproterozoic-Cambrian palaeogeography, \*Tectonophysics\*, 691, 198-205, 2016.](#)
- Zwaan, K. B.: Geology of the West Troms Basement Complex, northern Norway, with emphasis on the Senja Shear Belt: a preliminary account, *Nor. geol. unders. bull.*, 427, 33-36, 1995.
- Zwaan, K. B. and Gautier, A. M.: Alta and Gargia. Description of the geological maps (AMS-M711) 1834 1 and 1934 IV 1:50 000, *Nor. geol. unders.*, 357, 1-47, 1980.
- 1815

Zwaan, K. B. & Roberts, D.: Tectonostratigraphic Succession and Development of the Finnmarkian Nappe Sequence, North Norway, *Nor. geol. unders.*, 343, 53-71, 1978.

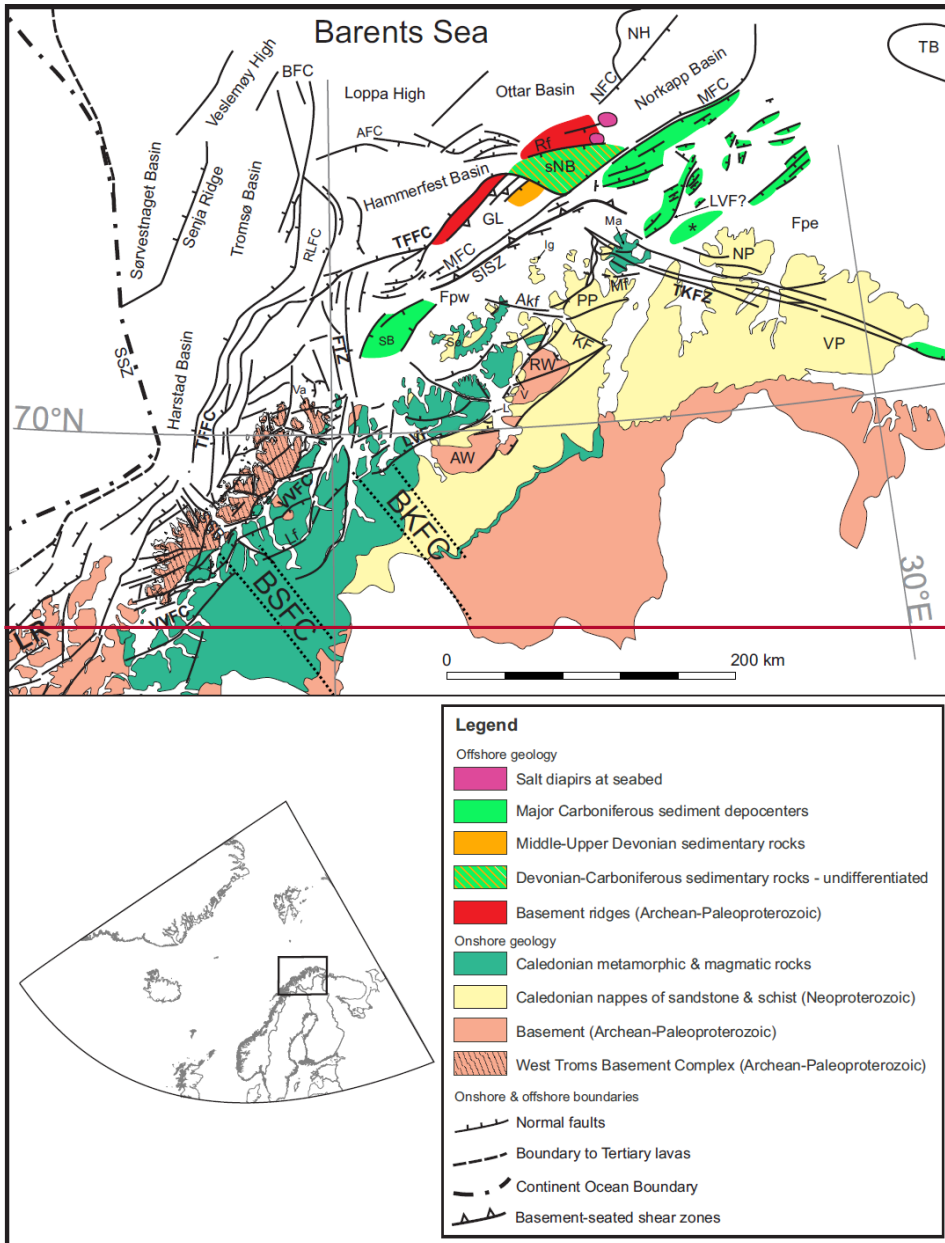

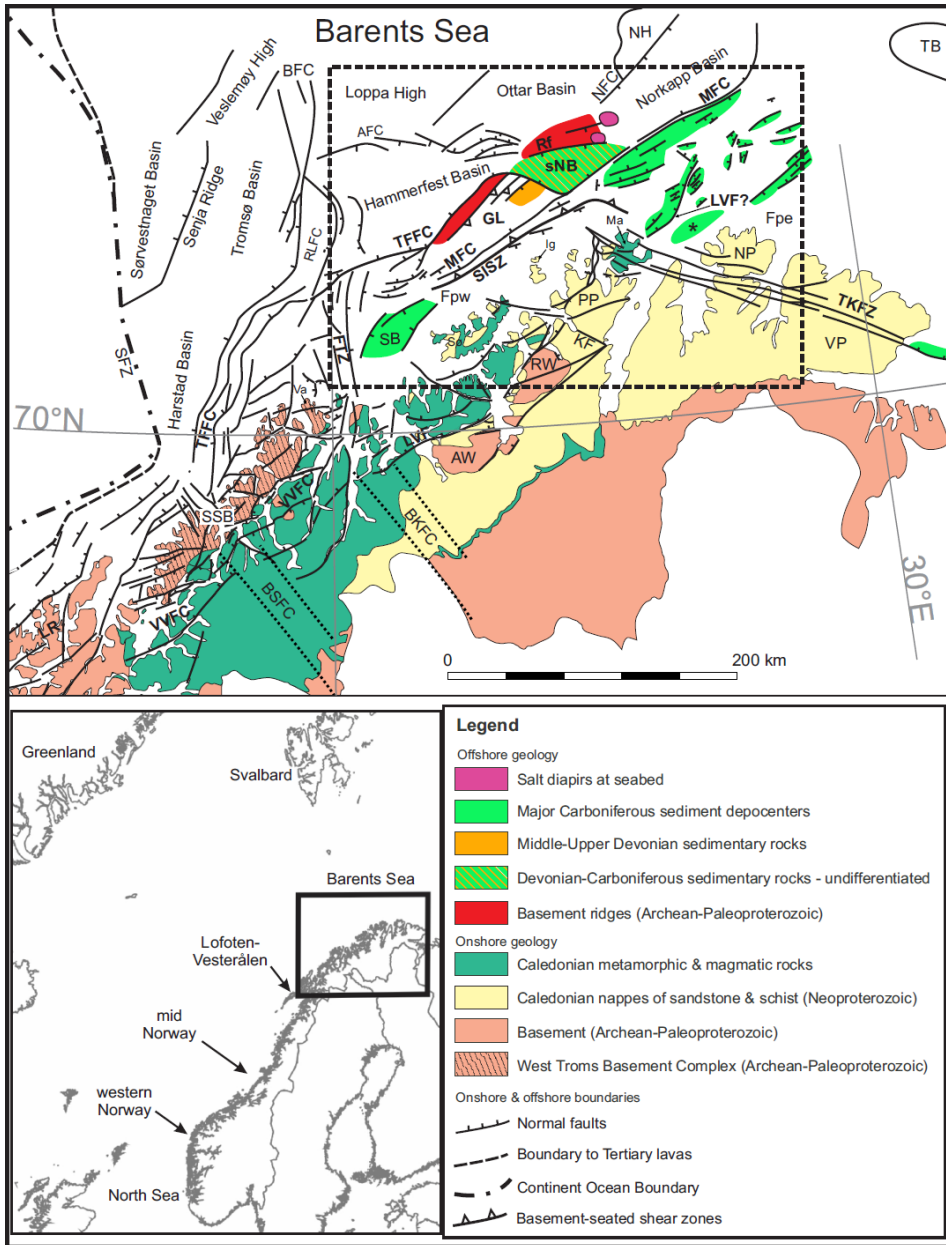

1820 Figure 1: Regional structural map of the SW Barents Sea margin (based on Bergh et al. 2007, Faleide et al. 2008, Hansen et  
al. 2012 and Indrevær et al. 2013 and Koehl et al. submitted). The onshore geology is from the NGU and Ramberg et al.  
(2008). ~~Dashed black frame locates Figure 2~~ ~~Figure 2~~. The black star marks the location of the speculated half-graben  
structure described in Bugge et al. (1995), which we reinterpret as a prograding sedimentary system unconformably resting  
on basement rocks. Location of the Barents Sea shown as a black frame in lower left inset map. Abbreviations: AFC =  
1825 Asterias Fault Complex; ~~Akf = Akkarfjord fault~~; AW = Alta-Kvænangen tectonic window; BFC = Bjørnøyrenna Fault  
Complex; BSFC = Bothnian-Senja Fault Complex; BKFC = Bothnian-Kvænangen Fault Complex; FPe = Finnmark  
Platform east; FPw = Finnmark Platform west; FTZ = Fugløy transfer zone; GL = Gjesvær Low; Ig = Ingøya; KF = Kokelv  
Fault; ~~L = Langfjorden~~; ~~Lf = Laksvatn fault~~; LR = Lofoten Ridge; LVF = Langfjord-Vargsund fault; Ma = Magerøya; ~~Mf~~  
1830 ~~= Magerøysundet fault~~; MFC = Måsøy Fault Complex; NFC = Nysleppen Fault Complex; NH = Norsel High; NP = Nordkinn  
Peninsula; PP = Porsanger Peninsula; Rf = Rolvsøya fault; RLFC = Ringvassøya-Loppa Fault Complex; RW = Repparfjord-  
Komagfjord tectonic window; SB = Sørvær Basin; SFZ = Senja Fracture Zone; SISZ = Sørøya-Ingøya shear zone; sNB =  
southwesternmost Nordkapp basin; ~~SSB = Sørøy sub-basin~~ Senja Shear Belt; ~~SSZ = Senja Shear Zone~~; SØ = Sørøya; TB =  
Tiddlybanken Basin; TFFC = Troms-Finnmark Fault Complex; TKFZ = Trollfjord en-Komagelva Fault Zone; ~~V =~~  
~~Vargsund~~; Va = Vannøya; VP = Varanger Peninsula; VVFC = Vestfjorden-Vanna fault complex.

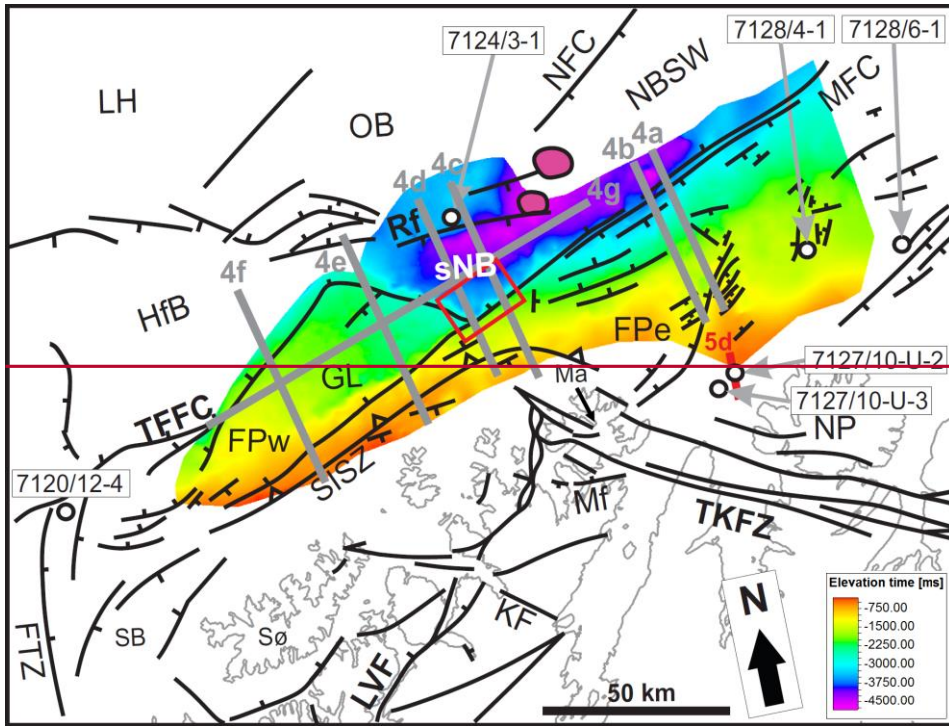



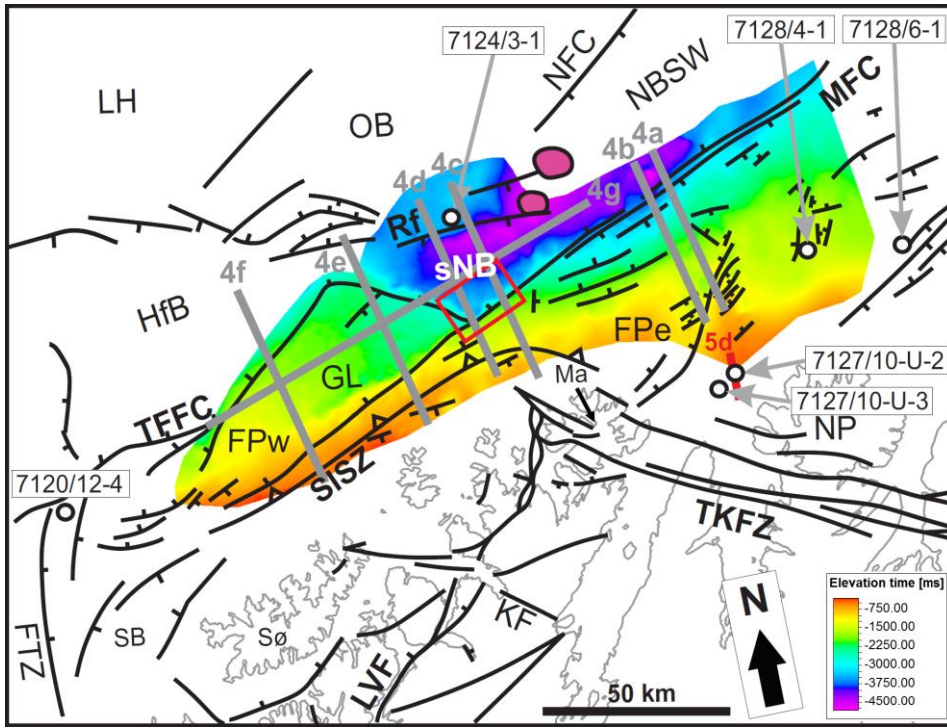

Figure 2: Regional structural map summarizing the architecture of the Finnmark Platform east (FPe) and west (FPw) and of the southwesternmost Nordkapp basin (sNB). The figure includes a time map of the interpreted mid-Carboniferous reflection. Grey lines show the location of seismic profiles displayed in Figure 5 Figure 5 Figure 4a-g, the red line displays the location of the seismic section shown in Figure 6 Figure 6 Figure 5d and the red frame indicates the location of seismic Z-slices described in Figure 8 Figure 8 Figure 7. White dots show the location of exploration wells and shallow drill-cores while purple blobs represent major salt diapirs in the southernmost part of the Nordkapp Basin (NBSW). See Figure 1 Figure 1 for abbreviations.

1840

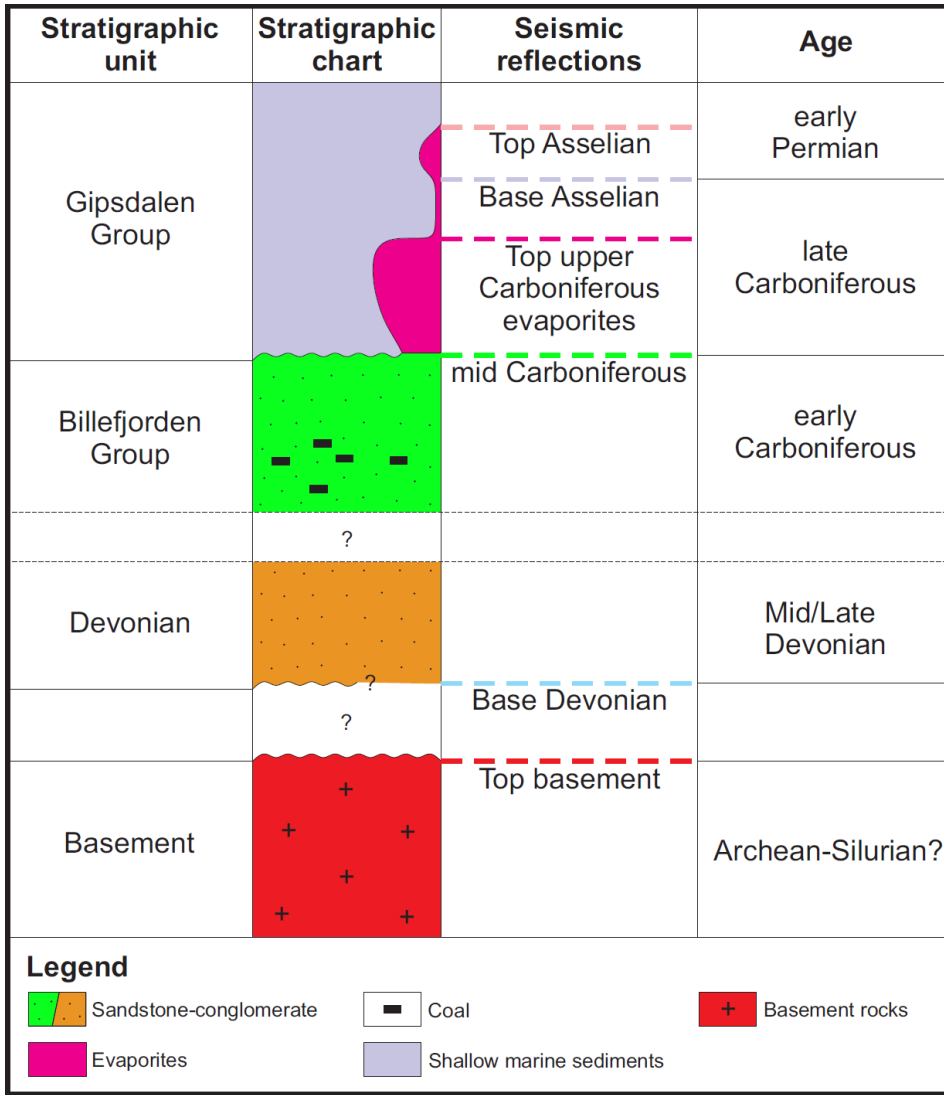

Formatted: Keep with next

1845 **Figure 3; Simplified stratigraphic chart of late Paleozoic sedimentary successions on the Finnmark Platform and in the southwesternmost Nordkapp basin. From left to right, columns indicate the unit name, the successions dominant lithologies and types of succession boundaries (undulating lines = erosional unconformity; straight line = conformity; dashed lines = uncertain), interpreted seismic reflections (cf. Figure 4 & Figure 5) and the units age. Lithological legend at the bottom.**

Formatted: Font: Bold, Not Italic, Font color: Auto

Formatted: Font: Not Italic, Font color: Auto

Formatted: Caption, Space After: 0 pt, Line spacing: single

Formatted: Font: Bold

1850

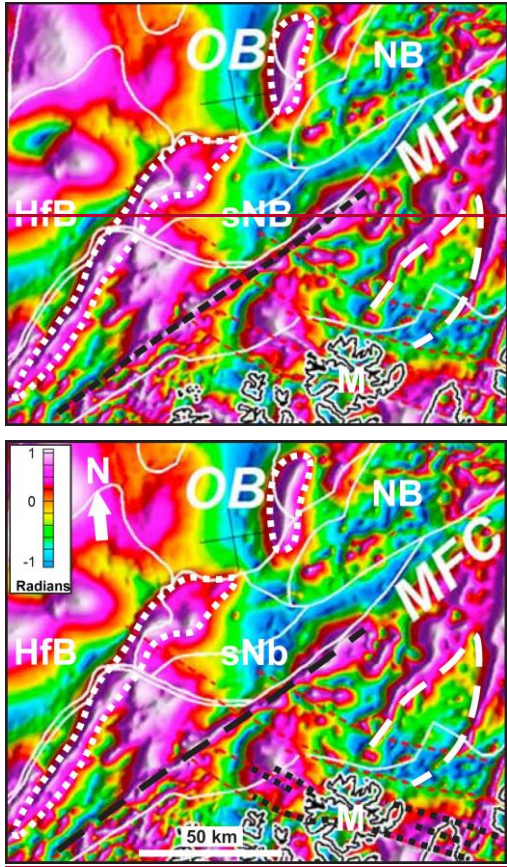

1855

1860

Figure 443: Zoom in offshore tilt-derivative aeromagnetic data published by Gernigon et al. (2014). The white dashed line on the Finnmark Platform east represents a triangular- to rhomboid-shaped aeromagnetic low that coincides with a Carboniferous basin bounded by zig-zag-shaped brittle faults (e.g. LVF). The dotted white lines on the Finnmark Platform west and on the northern flank of the southwesternmost basin represent ENE-WSW to NE-SW trending ridges of magnetic basement rocks. The dashed black line represents a linear, NE-SW trending, high positive aeromagnetic anomaly that has been tied to the occurrence of the main segment of the MFC (cf. Indrevær et al. 2013). Dolerite dykes intruded along WNW-ESE trending fault segments of the TKFZ are shown by dotted black lines. Dashed red lines represent inferred from Gernigon et al. (2014). See [Figure 1](#) for abbreviations.

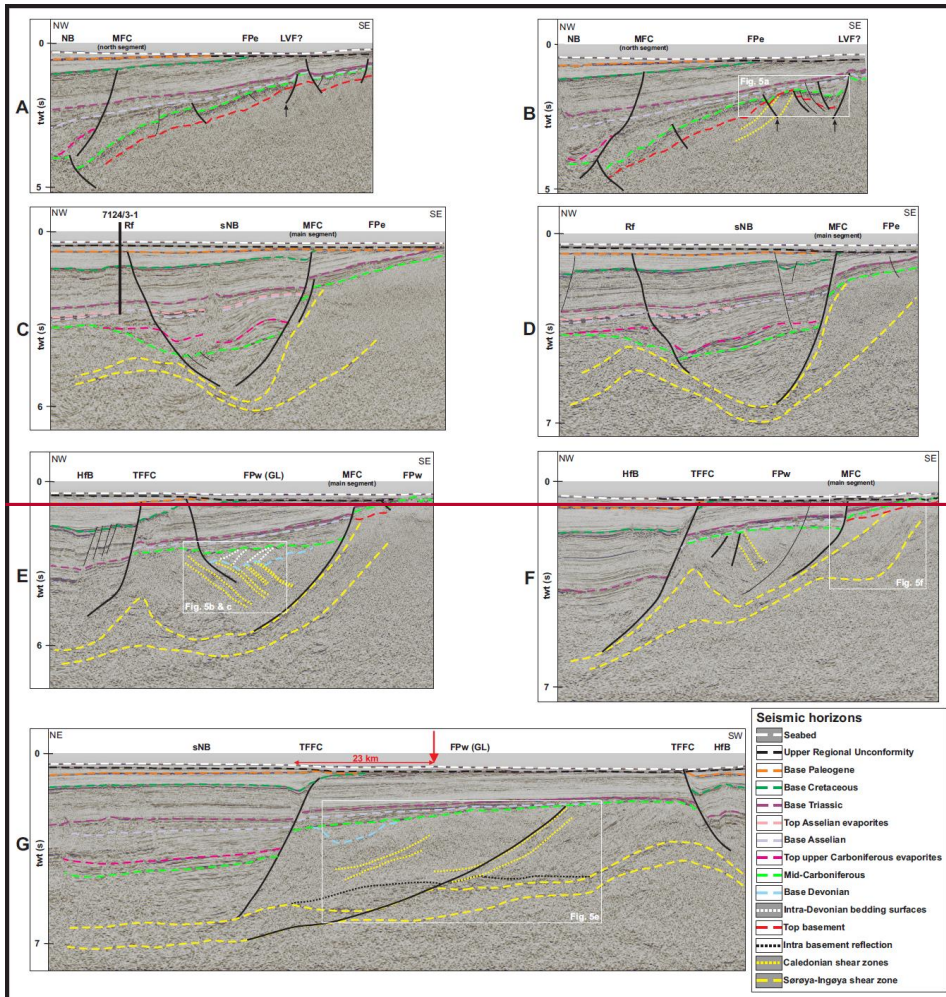

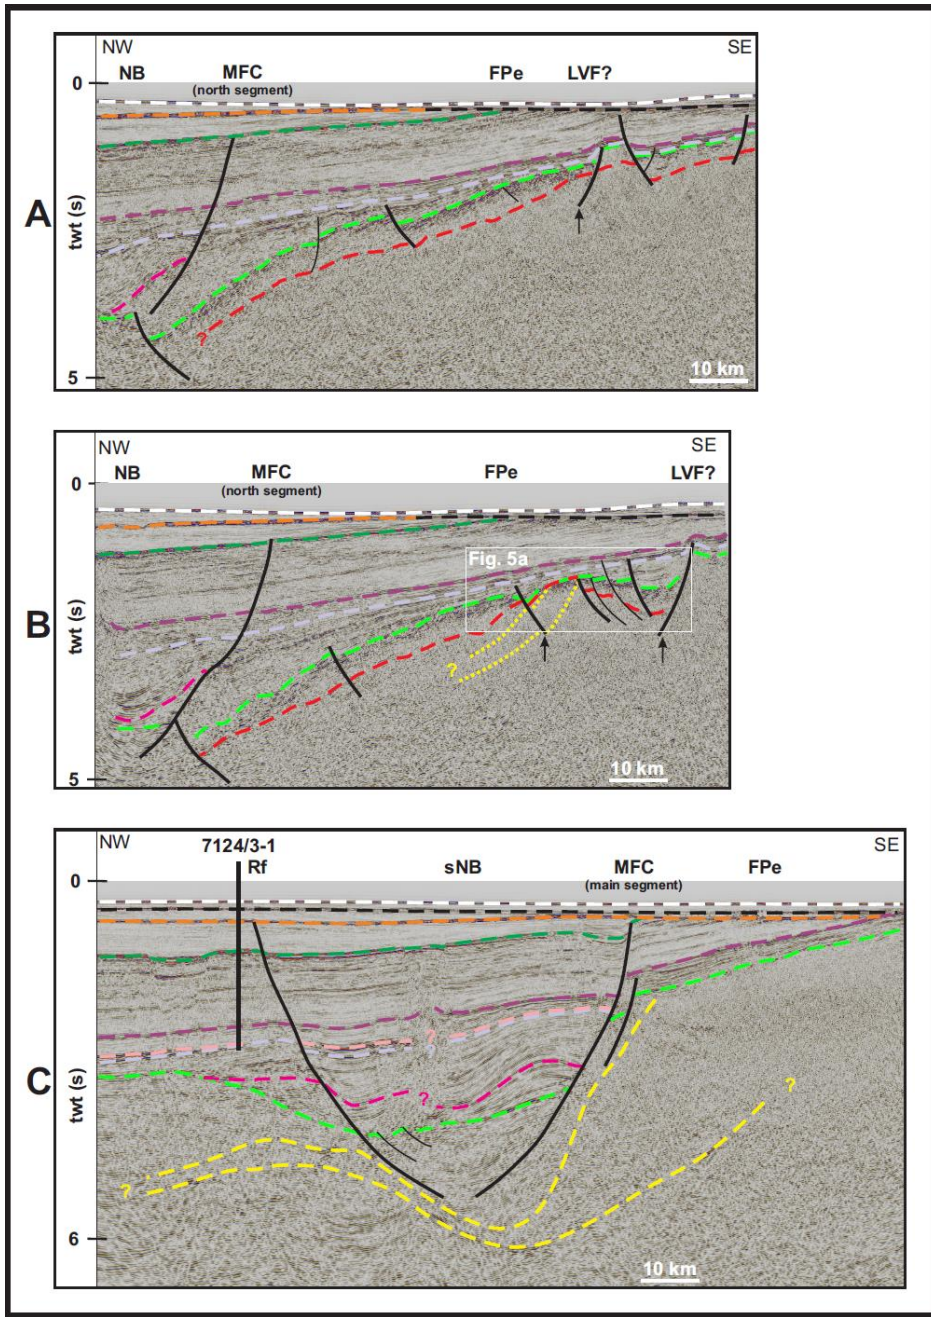

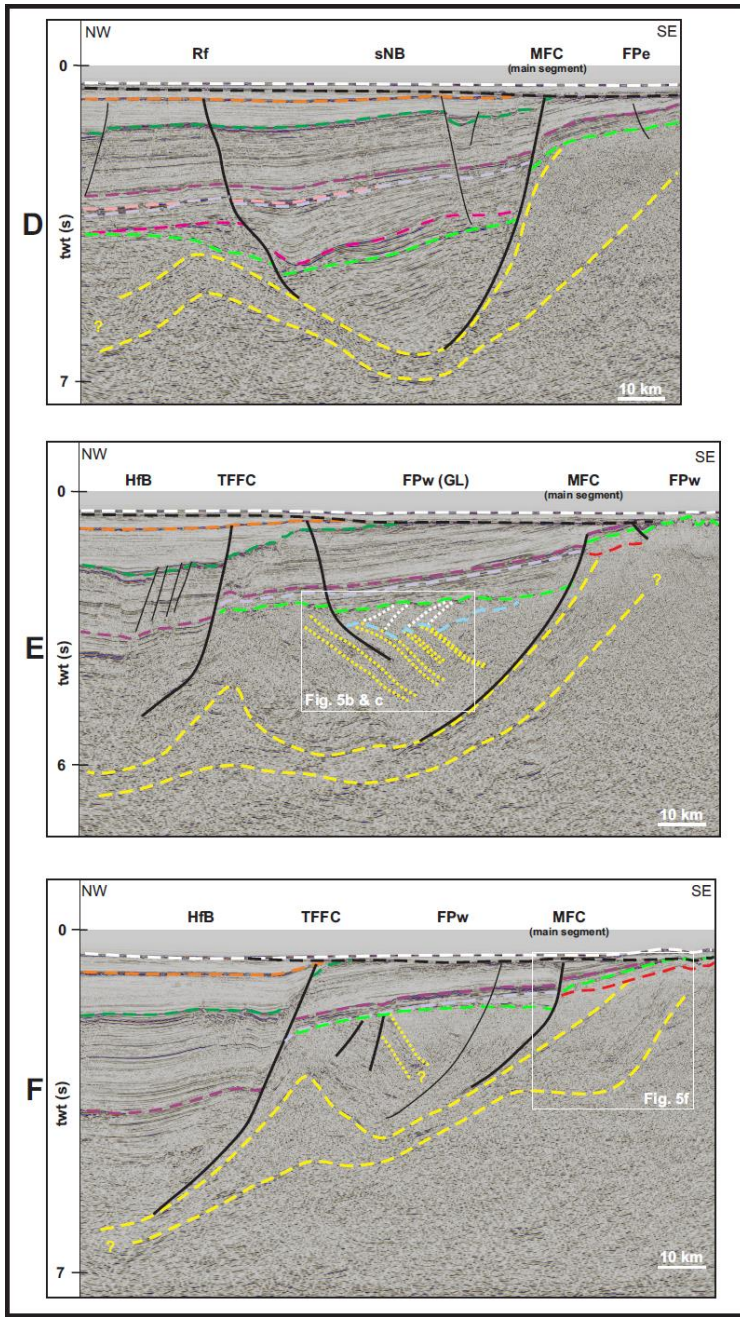

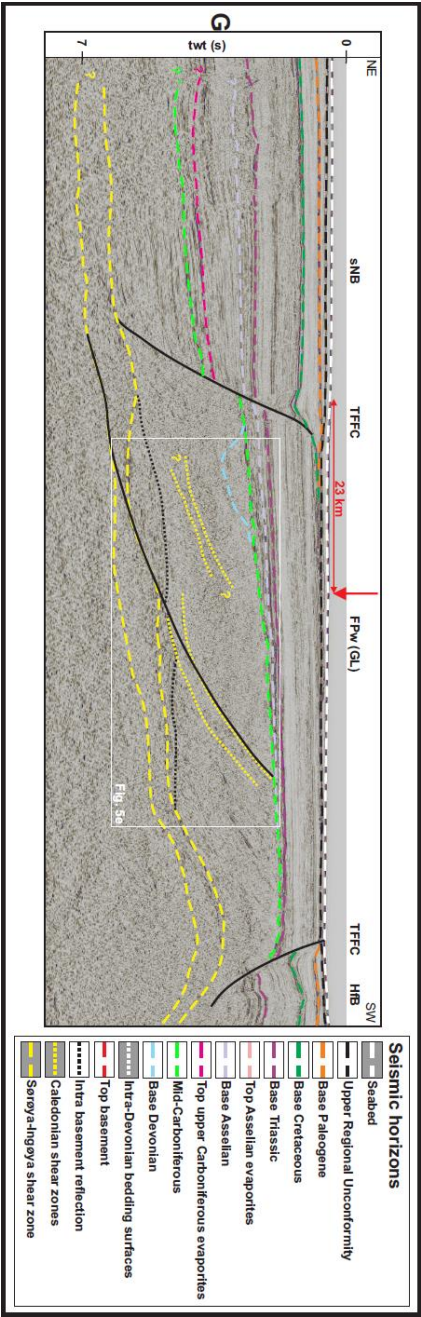

1865 Figure 5.4: Examples of interpreted seismic profiles from the BSS-01 survey (2D) which locations are displayed in Figure  
2. Brittle faults are shown in black and depth is in seconds (s) TWT. See Figure 1 for  
1870 abbreviations; a) Interpreted seismic section that shows a system of Carboniferous horst-graben structures on the Finnmark  
Platform east; b) Seismic profile showing increased normal displacement across the NW-dipping LVF compared with (a)  
and thickening of the Carboniferous sedimentary succession within the graben bounded by the LVF. Note the insignificant  
1875 amount of the displacement accommodated by the northern segment of the MFC in (a) and (b). Black arrows mark brittle  
faults that bound a triangular-shaped, negative aeromagnetic anomaly (cf. dashed white line in Figure 4);  
c) Seismic profile showing a highly thickened Carboniferous succession and potential Devonian-lower Carboniferous  
sedimentary rocks in the southwesternmost Nordkapp basin. Note the large offset accommodated by the main segment of  
the MFC and the peculiar “U” shape of the southwesternmost Nordkapp basin. Also displayed is a lateral projection of  
1880 exploration well 7124/3-1; d) Interpreted seismic section that shows the listric geometries of the main segment of the MFC  
and of the Rolvsøya fault; e) Seismic section showing potential Devonian sedimentary rocks deposited in a NE-SW trending  
graben above a set of minor, SE-dipping shear zones on the Finnmark Platform west; f) Seismic section showing the listric  
geometries of the TFFC and MFC, which both seem to sole into the SISZ; g) NE-SW trending seismic cross-section across  
the Finnmark Platform west and the southwesternmost Nordkapp basin showing the gentle dip of the SISZ to the northeast  
and a gradual thinning of the upper Carboniferous sedimentary succession towards the southwest. A major NNE-SSW  
trending, SE-dipping brittle fault seems to offset the SISZ and an intra-basement reflection on the Finnmark Platform west  
before being truncated by the mid-Carboniferous reflection. The vertical red arrow shows the location of the imaginary  
prolongation of the TKFZ on the Finnmark Platform west as a comparison with the actual location of the WNW-ESE  
trending fault segment of the TFFC, which are separated by a distance of ca. 23 km.



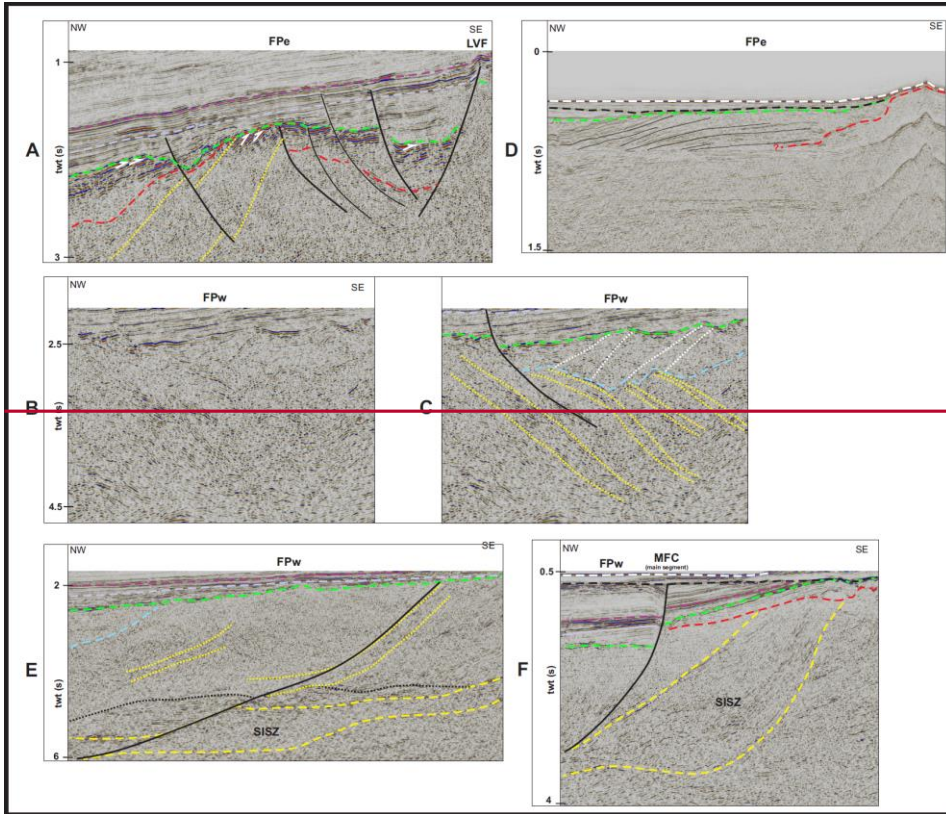

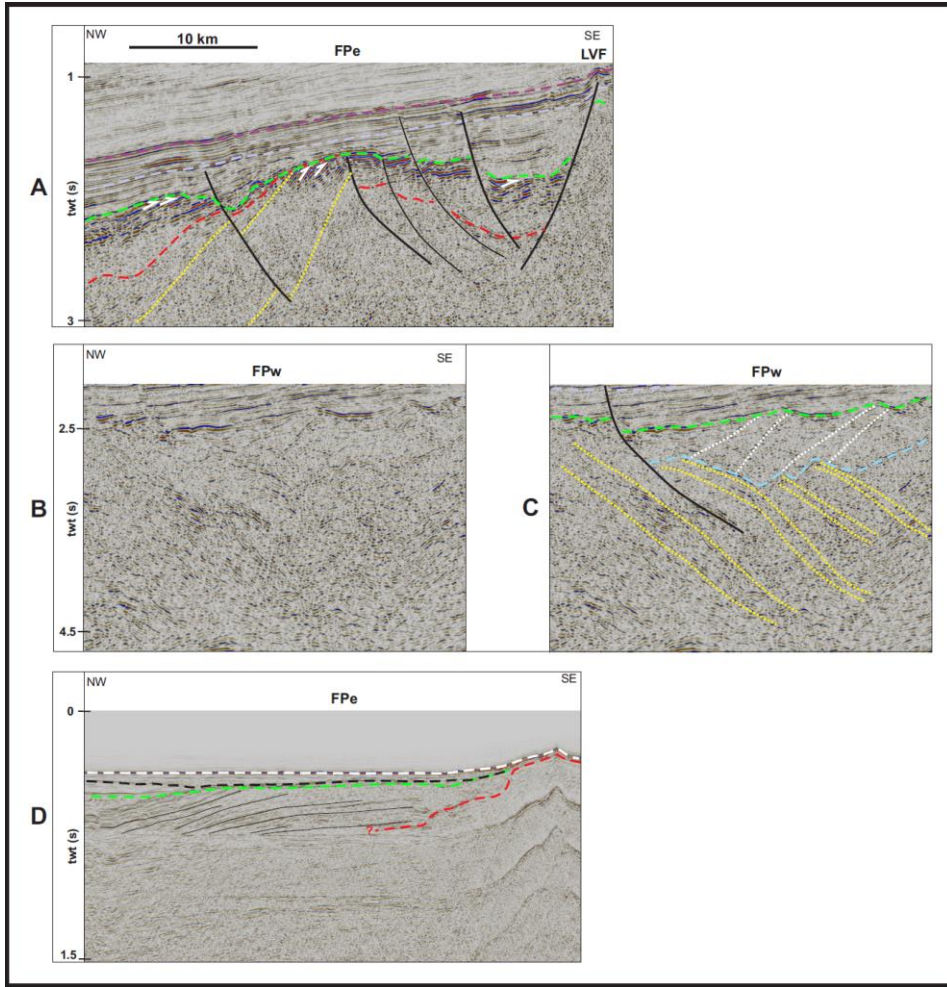

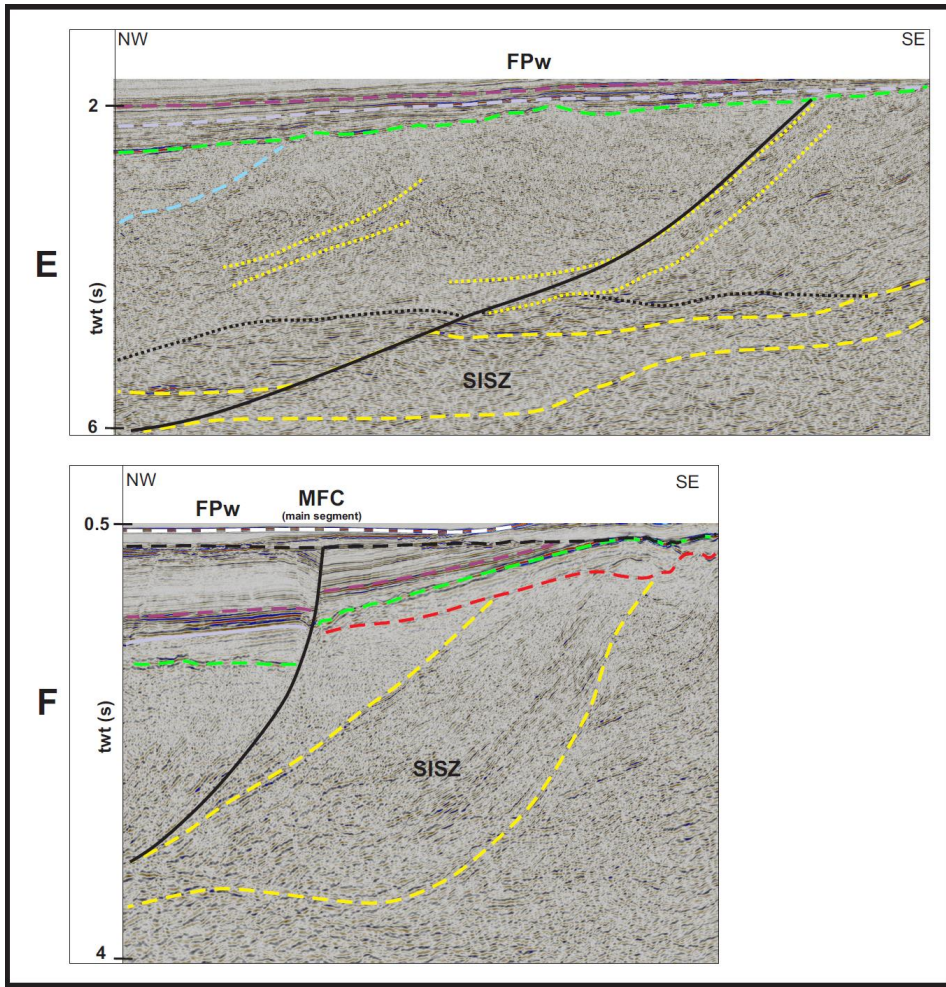

Figure 665: Zoom in seismic sections on the Finnmark Platform east and west. The locations of (a), (b), (c), (e), & (f) are displayed as white frames in Figure 5Figure 5Figure 4 and the location of (d) is shown as a red line in Figure 2Figure 2Figure 2. See Figure 1Figure 1Figure 1 for abbreviations and Figure 5Figure 5Figure 4 for seismic reflection legend; a) Interpreted seismic section across the Finnmark Platform east. White arrows represent high-amplitude lower Carboniferous and basement seismic reflections that are truncated upwards (toplaps) by the mid-Carboniferous reflection. Note the contrast between low-amplitude upper Carboniferous-Permian reflections, gently dipping, high-amplitude lower Carboniferous reflections and steeply dipping, high-amplitude basement reflections that possibly belong to a basement-seated shear zone (yellow dotted lines); b) uninterpreted and c) interpreted seismic zoom of a section across presumed Devonian sedimentary rocks and SE-dipping basement shear zones (yellow dotted lines) on the Finnmark Platform west; d) Interpreted seismic section from the IKU-87-BA (2D) survey showing a thick lower Carboniferous succession made up of large clinofolds (thin black lines) on the Finnmark Platform east (location in Figure 2Figure 2Figure 2). Note the presence of seismic artifacts in the southeast, including several multiples and NW-dipping diffraction rays; e) Interpreted seismic section across the Finnmark Platform west that displays NE-dipping basement shear zones (yellow dotted lines) including the SISZ (yellow dashed lines); f) Seismic zoom in the SISZ in the footwall of the main segment of the MFC on the Finnmark Platform west.

**The SISZ is composed of NW-dipping, moderate- to high-amplitude reflections that dip more gently than the MFC but that are steeper than basement reflections in the southeast. Note the significant thickness variations of the SISZ, thick in the footwall of the MFC and thin below the MFC.**

1905

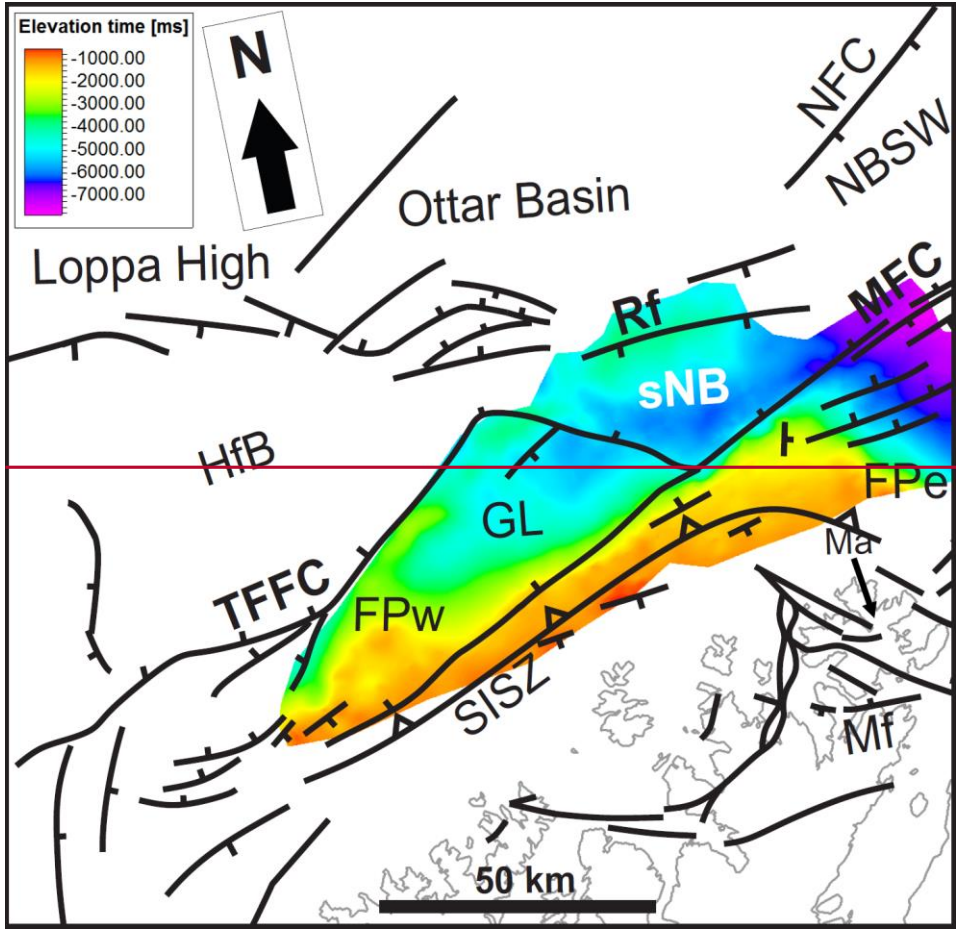

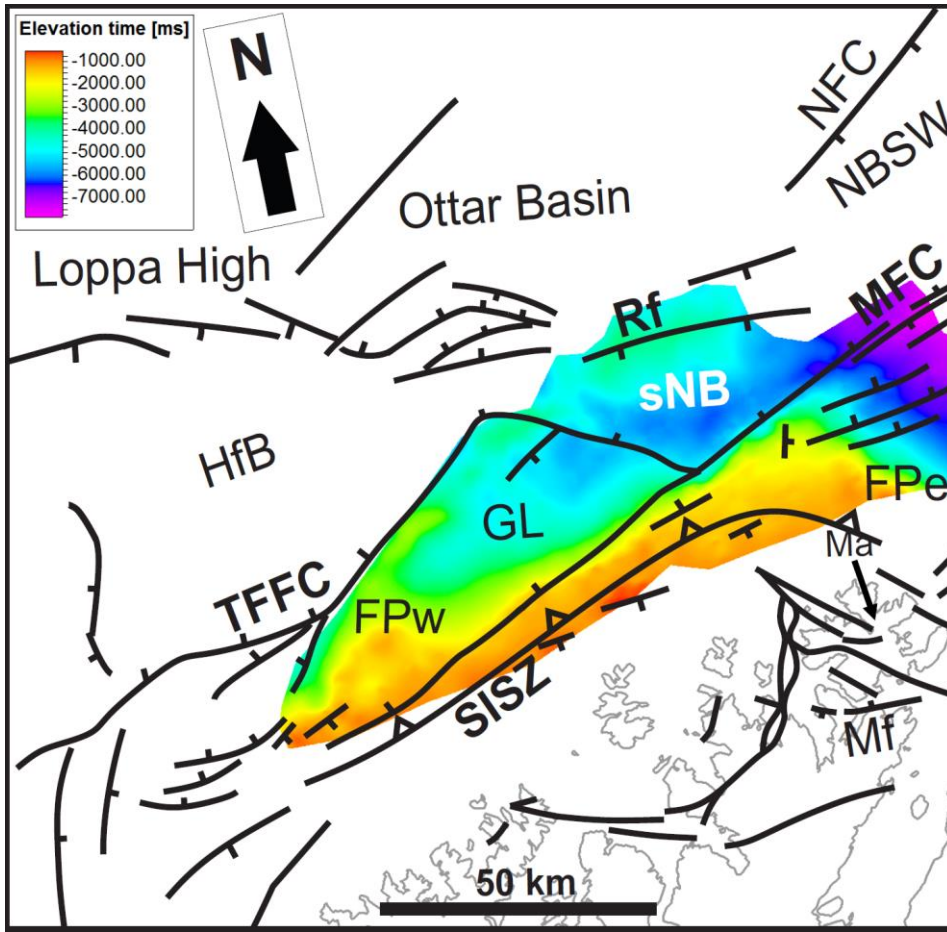

Figure 7.6: Time surface map of the top reflection of the SISZ and major brittle faults in the SW Barents Sea. Note the spoon-shaped depression formed by the SISZ on the Finnmark Platform west and southwesternmost Nordkapp basin, the abrupt change to a northeastward dip on the Finnmark Platform east, and the two narrow, NE-SW and ENE-WSW trending ridges in the footwall of the TFFC and of the Rolvsøya fault.

1910

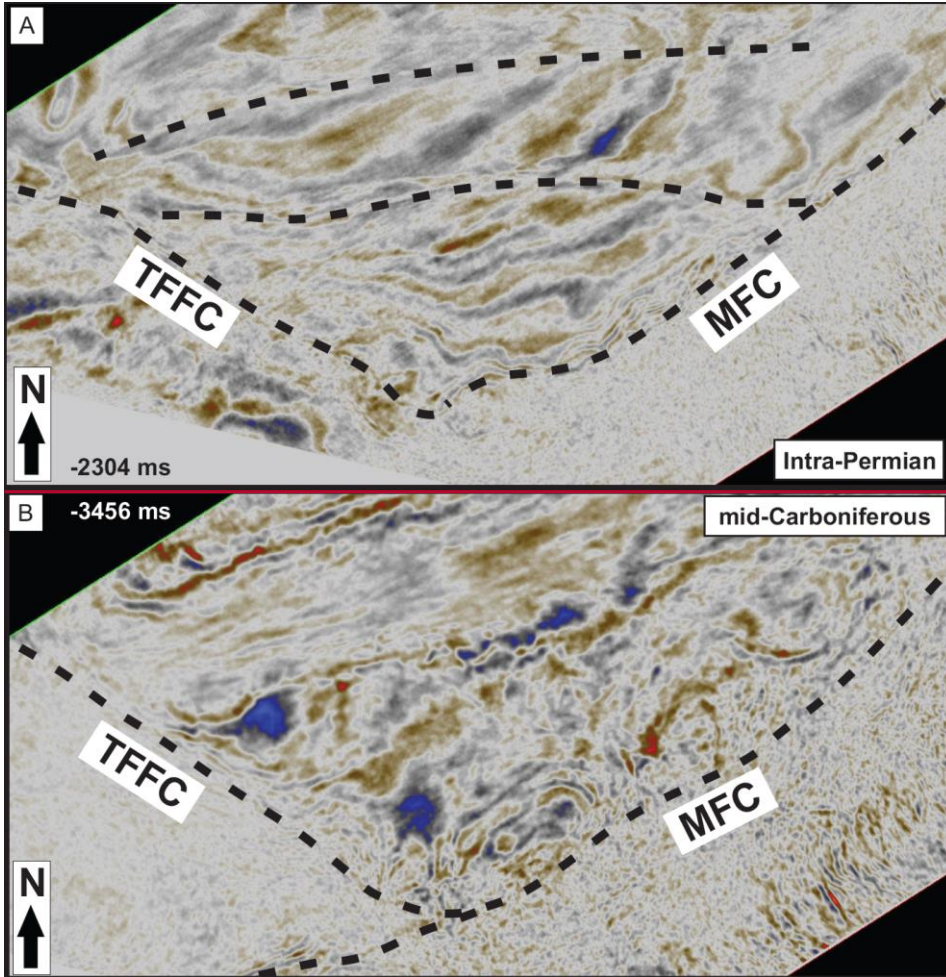

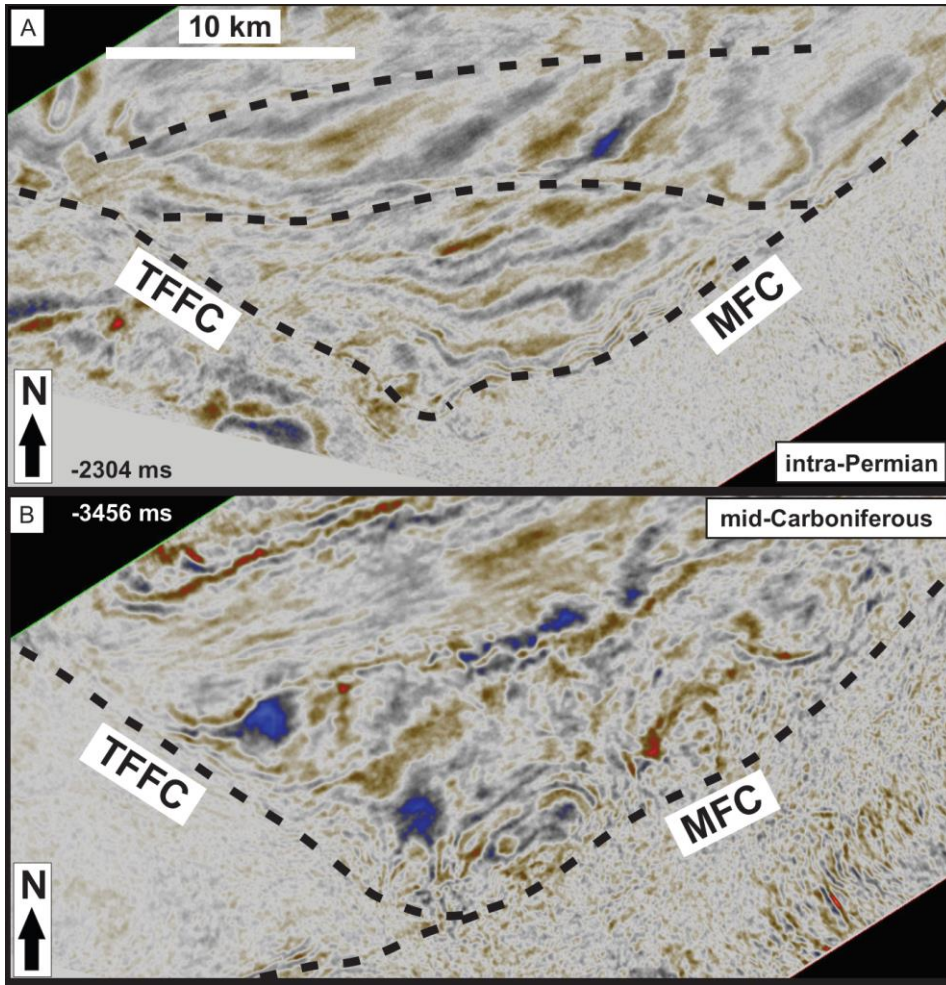

Figure 887: (a) Intra-Permian seismic time-slice within 3D seismic survey MC3D-MFZ02 in the southwesternmost Nordkapp basin. Dashed black lines correspond to interpreted brittle faults; (b) Seismic time-slice within 3D seismic survey MC3D-MFZ02 near the interpreted mid-Carboniferous reflection in the southwesternmost Nordkapp basin. Black dashed lines represent interpreted brittle faults. See [Figure 2](#) for location.



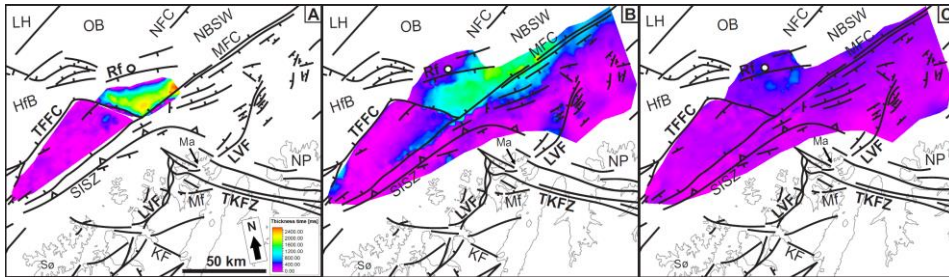

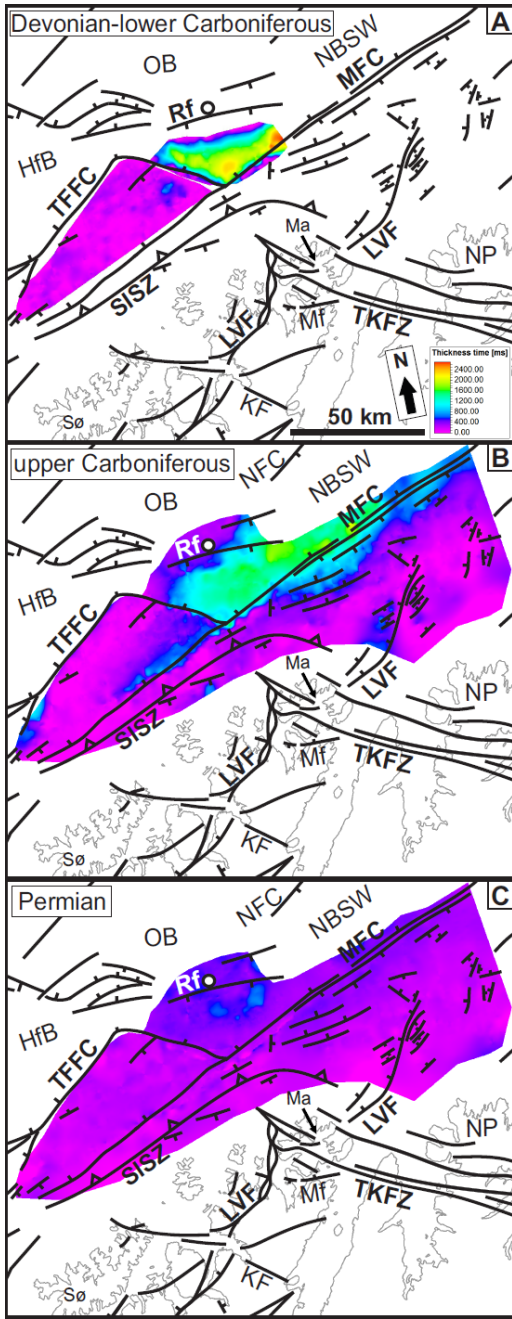

1920 | Figure 998: Thickness maps in milliseconds (ms) two-way time (TWT) of late Paleozoic sedimentary successions on the Finnmark Platform and in the southwesternmost Nordkapp basin. Color scale in (a); a) Thickness map of the Devonian-lower Carboniferous succession on the Finnmark Platform west and in the southwesternmost Nordkapp basin. The succession is thickest in the southwesternmost Nordkapp basin and represents the thickest sedimentary unit of the basin. Note that in this part of the margin, the SISZ and basin-bounding faults were used as base Devonian reflections. On the Finnmark Platform west, lower Carboniferous sedimentary rocks are missing but Devonian sedimentary deposits are possibly preserved in an ENE-WSW trending graben adjacent to the southwesternmost Nordkapp basin and bounded to the southeast by the MFC; b) Thickness map of the upper Carboniferous sedimentary succession showing gradual thickening of upper Carboniferous sedimentary rocks in the southwesternmost Nordkapp basin, on the Finnmark Platform west in the hanging-wall of the MFC, and on the Finnmark Platform east in the hanging-wall of the LVF and of a SE-dipping fault that parallels the MFC; c) Thickness map of the Permian succession showing very thin Permian sedimentary deposits and very mild thickness variations within the Permian sedimentary succession throughout the study area.

1925 |

1930 |

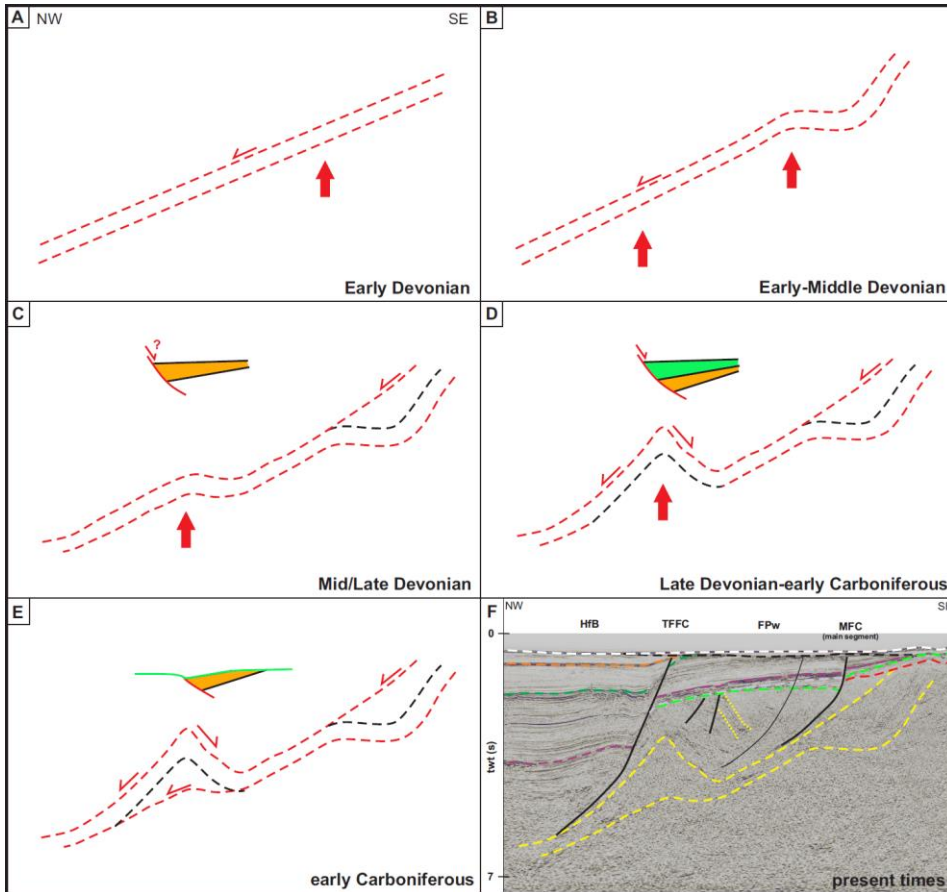

1935  
1940  
1945  
1950

Figure 10109: Evolutionary model that tentatively explains thickness variations along the SISZ. Note that the timing of (a) to (e) is tentative. Dashed red lines in (a) to (e) correspond to tectonically active portions of the SISZ whereas dashed black lines show inactive portions of the SISZ. Red lines in (c), (d) & (e) show presumed normal faults. Thick vertical red arrows indicate exhumation of basement rocks along the SISZ. The model is adapted to the geometry of the SISZ observed below the Finnmark Platform west (see f); a) Extensional reactivation (thin red arrow) of the SISZ in Early Devonian times. Rapid crustal thinning and possible erosion along the upper part of the SISZ triggers exhumation of basement rocks near the coasts of NW Finnmark (thick red arrow); b) In the Early-Middle Devonian, continued extension and erosion, further thin the crust, crustal thinning and basement exhumation basement rocks in the footwall of the SISZ, leading the upper part of the SISZ to bow. Further incremental crustal thinning due to continued extensional reactivation of the SISZ and continental erosion triggers exhumation of basement rocks along lower portions of the SISZ (left-hand side, thick red arrow); c) In Mid/Late Devonian times, bowed portions of the SISZ become inactive and excision (i.e. upwards splaying; cf. Lister & Davis 1989) of the SISZ into its hanging-wall leads to thickening of the upper portion of the SISZ. Continued extension and erosion (i.e. crustal thinning) triggers bending of the lower part of the SISZ (thick red arrow) above which brittle normal faults may have formed and localized the deposition of Devonian sedimentary deposits (orange); d) Further exhumation of basement rocks along lower portions of the SISZ in the Late Devonian-early Carboniferous leads to extreme bending of the SISZ, to antithetic top-to-the-SE extensional faulting, and to early Carboniferous syn-tectonic sedimentation (green); e) Towards the end of the early Carboniferous, the lower portion of the SISZ is thickened due to incision (i.e. downward splaying; cf. Lister & Davis 1989) of the SISZ into bow-shaped portions in its footwall. Core complex exhumation ceased in the Serpukhovian and a major sea-level fall exposed the Finnmark Platform to continental erosion (green line representing

the mid-Carboniferous reflection); f) Present times seismic expression of thickness variations along the SISZ (dashed yellow) on the Finnmark Platform west. See [Figure 5](#)~~Figure 5~~[Figure 4](#) for seismic reflections color schemes.

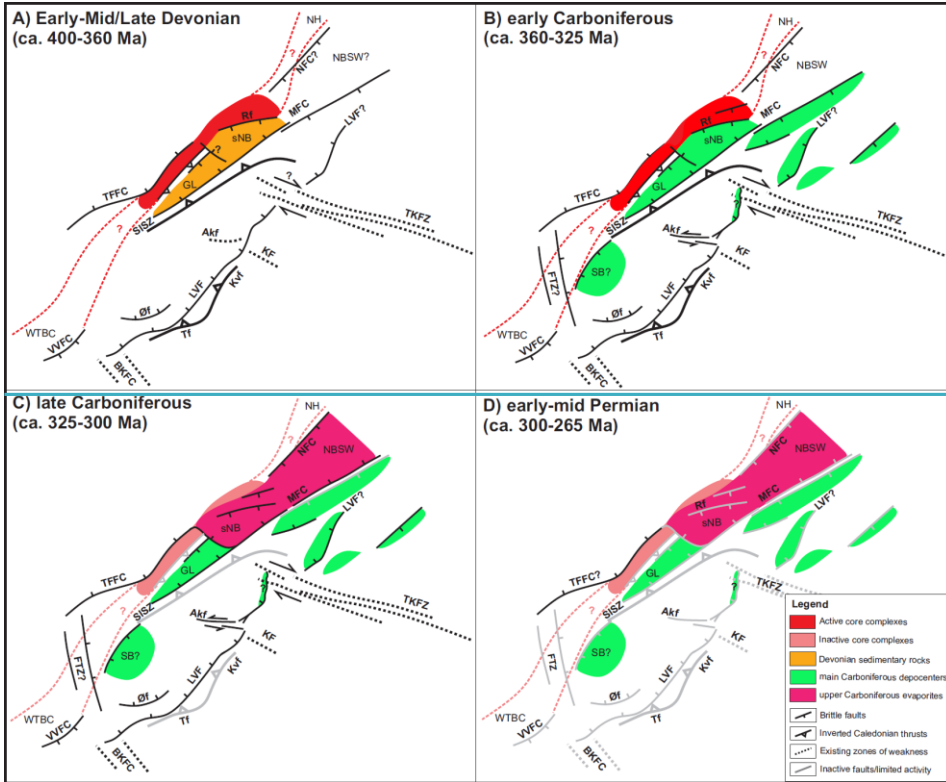

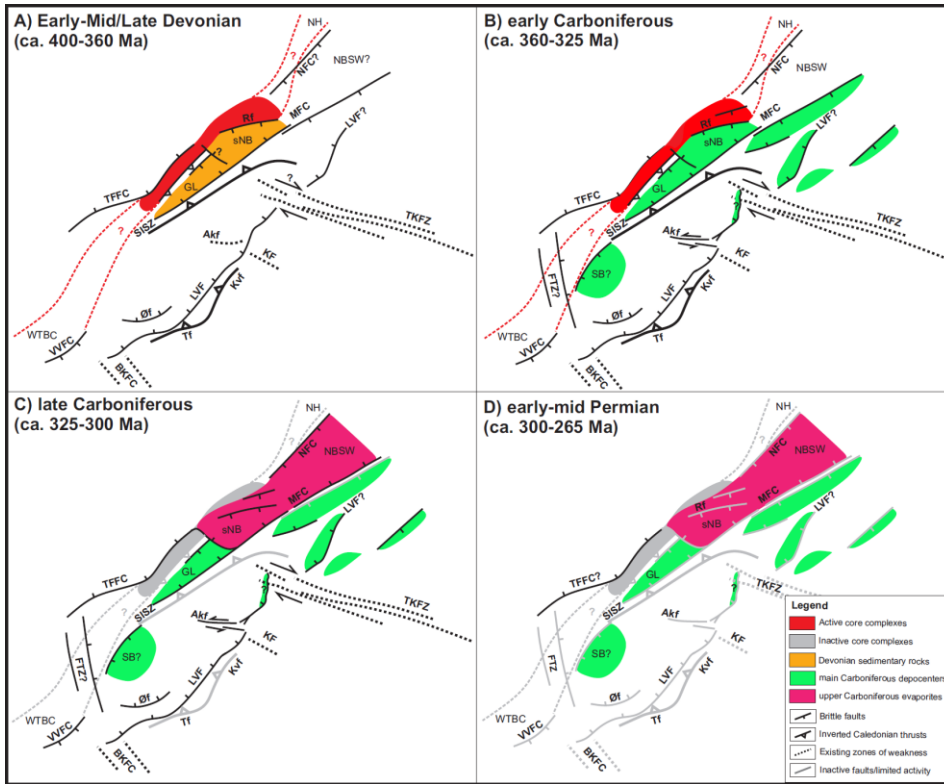

1955 Figure 11110: Map-view figures summarizing the late Paleozoic tectono-sedimentary evolution of the Finnmark Platform and southwesternmost Nordkapp basin (sNB). The tectonic evolution of onshore and nearshore faults in NW Finnmark is from Koehl et al. (submitted). Abbreviations as in Figure 11110-1. a) In the Early to Mid/Late Devonian, major Caledonian thrusts (e.g. SISZ) were inverted as low-angle extensional shear zones and exhumed metamorphic core complexes in the footwall of the TFFC and of the Rolvsøya fault. Thick Devonian sedimentary rocks were deposited within a spoon-shaped trough created by the geometry of the SISZ; b) Core complex exhumation continued through the early Carboniferous, though mostly accommodated by high-angle normal faults, which formed as brittle splays along Caledonian thrusts and shear zones (e.g. MFC, TFFC, Rolvsøya fault and LVF). Core complex exhumation ceased by the end of the Serpukhovian and the WNW-ESE trending fault segment of the TFFC formed as an accommodation cross-fault that decoupled the Finnmark Platform west from the southwesternmost Nordkapp basin, thus contributing to preserve thick Devonian and lower Carboniferous sedimentary successions in the southwesternmost Nordkapp basin while these sedimentary rocks were almost completely eroded on the Finnmark Platform west. Minor graben and half-graben structures formed on the Finnmark Platform east. Precambrian, WNW-ESE to NNW-SSE trending fault zones such as the TKFZ segmented the margin and acted as minor transfer faults that accommodated limited amount of lateral displacement. Lateral movements along these faults ceased in the early Carboniferous; c) In the late Carboniferous, inverted Caledonian thrusts and shear zones became inactive and were truncated by high-angle splay-faults that accommodated the deposition of syn-tectonic sedimentary wedges on the Finnmark Platform east and west, and of thick, partly evaporitic deposits in the southwesternmost Nordkapp basin; d) By the end of the Carboniferous, active brittle faulting came to a halt and the Finnmark Platform and the southwesternmost Nordkapp basin are believed to have remained tectonically quiet.

1960

1965

1970
